# Supplementary material for: Half sandwich ruthenium(ii) hydrides: hydrogenation of terminal, internal, cyclic and functionalized olefins
Source: Royal Society of Chemistry journal article supplement (doi:10.1039/c4dt02407a), 2014-01-01
Supplement: c4dt02407a1.pdf [file c4dt02407a1.pdf]

# Half Sandwich Ruthenium(II) Hydrides for the Hydrogenation of Terminal, Internal, Cyclic Olefins and Olefins with Functional Groups

Bidraha Bagh and Douglas W. Stephan\*

Department of Chemistry, University of Toronto, 80 St. George Street, Toronto, Ontario, Canada M5S 3H6

Corresponding Author: dstephan@chem.utoronto.ca

**Synthesis of [PhCH<sub>2</sub>N<sub>2</sub>(NMe)C<sub>2</sub>(C<sub>6</sub>H<sub>4</sub>CF<sub>3</sub>)]<sup>+</sup>[OTf]<sup>-</sup>.** MeOTf (1.805 g, 11.00 mmol) was added dropwise to a solution of 1,2,3-triazole [PhCH<sub>2</sub>N<sub>3</sub>C<sub>2</sub>H(C<sub>6</sub>H<sub>4</sub>CF<sub>3</sub>)] (3.035 g, 10.00 mmol) in CH<sub>2</sub>Cl<sub>2</sub> (20 mL) at r.t. The reaction mixture was stirred for 18 h resulting in a colorless solution. All volatiles were removed under high vacuum yielding a colorless oil which solidified on standing. The solid was washed with hexane (3 x 15 mL) and dried under vacuum to give [PhCH<sub>2</sub>N<sub>2</sub>(NMe)C<sub>2</sub>(C<sub>6</sub>H<sub>4</sub>CF<sub>3</sub>)]<sup>+</sup>[OTf]<sup>-</sup> (4.239 g, 91%) as pure product. <sup>1</sup>H NMR (CD<sub>2</sub>Cl<sub>2</sub>): δ 4.25 (s, 3H, N-CH<sub>3</sub>), 5.81 (s, 2H, CH<sub>2</sub>), 7.37-7.49 (m, 3H, C<sub>6</sub>H<sub>5</sub>), 7.52-7.63 (m, 2H, C<sub>6</sub>H<sub>5</sub>), 7.75-7.88 (m, 4H, C<sub>6</sub>H<sub>4</sub>), 8.78 (s, 1H, triazolium-H). <sup>13</sup>C NMR (CD<sub>2</sub>Cl<sub>2</sub>): δ 39.27 (N-CH<sub>3</sub>), 58.14 (CH<sub>2</sub>), 126.00, 126.94, 129.45, 129.80, 130.03, 130.39, 130.60, 131.48, 133.65, 142.57 (Ar-C and triazolium-C). <sup>19</sup>F NMR (CD<sub>2</sub>Cl<sub>2</sub>): δ -63.54, -78.96. Anal. Calcd for C<sub>18</sub>H<sub>15</sub>F<sub>6</sub>N<sub>3</sub>O<sub>3</sub>S (467.39): C, 46.26; H, 3.23; N, 8.99. Found: C, 46.21; H, 3.25; N, 9.02.

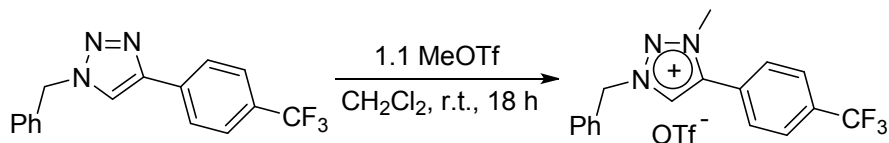

**Hydrogenation of olefins at 80 °C by **5d**.** In a glove box, a sample of the ruthenium-hydride complex **5d** (6.5 mg, 10 μmol), C<sub>6</sub>D<sub>5</sub>Br (0.5 mL) and substrate (0.2 mmol) were combined in a vial. The mixture was transferred to a J. Young tube and the J. Young tube was sealed. On a Schlenk line, the reaction mixture was degassed four times using the freeze-pump-thaw method. The sample was then frozen once more in liquid nitrogen and 4 atm of H<sub>2</sub> was added. The J. Young tube was sealed again and warmed to room temperature and then placed in an oil bath pre-heated to 80 °C. <sup>1</sup>H NMR spectra were measured at appropriate intervals and relative integration of substrate and product peaks were used to determine the composition of the mixture. The results are summarized in Table S1.

**Note:** Catalyst **5d** slowly decomposed at 80 °C over time (Figure S30). In C<sub>6</sub>D<sub>5</sub>Br the hydride resonance of **5d** was observed at -5.91 ppm. Heating a solution of **5d** in C<sub>6</sub>D<sub>5</sub>Br for an hour, another hydride resonance at -6.31 ppm was observed. The intensity of the second hydride resonance (-6.31 ppm) increased with time whereas the intensity of the first hydride resonance (-5.91 ppm) decreased. In 5 hours, both of the hydride resonances disappeared completely and species **5d** completely decomposed to unidentified products. As compared to the hydrogenation of olefins catalyzed by **5d** at 50 °C, the hydrogenation of 1-hexene, 2-hexene, allyl alcohol and acrylaldehyde at 80 °C was faster. Similar activity of **5d** was observed for the reduction of 3-buten-2-one both at 50 and 80 °C. At 80 °C much reduced activity was observed for rest of the substrates as compared to activity at 50 °C.

**Table S1.** Hydrogenation catalysis with **5d**<sup>a</sup>

| entry | substrate                                                                           | product                                                                             | cat       | time/yield (h/%) <sup>b</sup> |
|-------|-------------------------------------------------------------------------------------|-------------------------------------------------------------------------------------|-----------|-------------------------------|
| 1     | 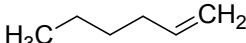   |    | <b>2a</b> | 2/100                         |
| 2     |    |    | <b>2a</b> | 3/19<br>5/37<br>24/41         |
| 3     |    |    | <b>2a</b> | 2/100                         |
| 4     |    |    | <b>2a</b> | 3/36<br>5/50<br>24/55         |
| 5     |    |    | <b>2a</b> | 3/15<br>5/22<br>24/28         |
| 6     |    |    | <b>2a</b> | 3/34<br>5/51<br>24/61         |
| 7     |    |    | <b>2a</b> | 3/29<br>5/44<br>24/55         |
| 8     |    |    | <b>2a</b> | 3/24<br>5/40<br>24/51         |
| 9     |   |   | <b>2a</b> | 2/100                         |
| 10    |  |  | <b>2a</b> | 1/100                         |
| 11    |  |  | <b>2a</b> | 4/100                         |
| 12    |  |  | <b>2a</b> | 8/100                         |
| 13    |  |  | <b>2a</b> | 4/100                         |
| 14    |  |  | <b>2a</b> | 3/29<br>5/48<br>24/53         |
| 15    |  |  | <b>2a</b> | 3/18<br>5/31<br>24/36         |
| 16    |  |  | <b>2a</b> | 3/17<br>5/21<br>24/31         |
| 17    |  |  | <b>2a</b> | 3/15<br>5/20<br>24/25         |
| 18    |  |  | <b>2a</b> | 3/21<br>5/29<br>24/32         |

<sup>a</sup>Conditions: 0.10 mmol of substrate and 5 mol % of catalyst in C<sub>6</sub>D<sub>5</sub>Br at 80 °C under 4 atm of H<sub>2</sub>.<sup>b</sup>Yields were determined by <sup>1</sup>H NMR spectroscopy.

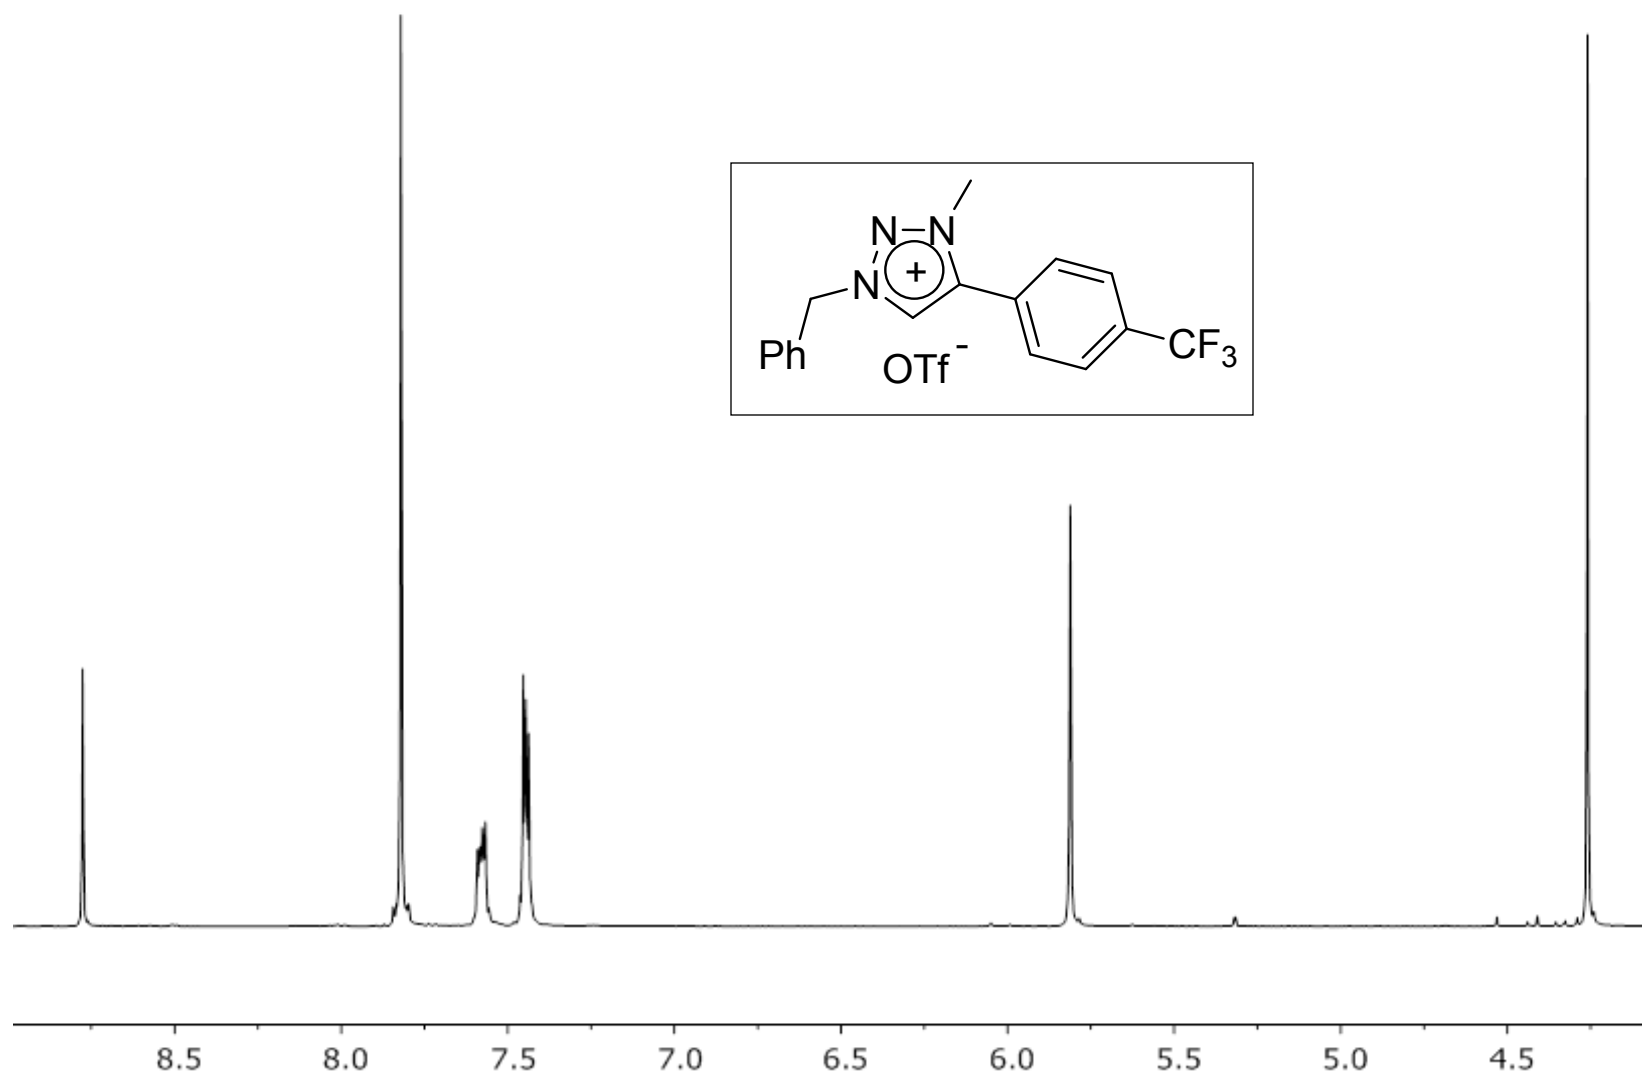

**Figure S1.**  $^1\text{H}$  NMR spectrum of  $[\text{PhCH}_2\text{N}_2(\text{NMe})\text{C}_2(\text{C}_6\text{H}_4\text{CF}_3)]^+[\text{OTf}]^-$  in  $\text{CD}_2\text{Cl}_2$  at r.t.

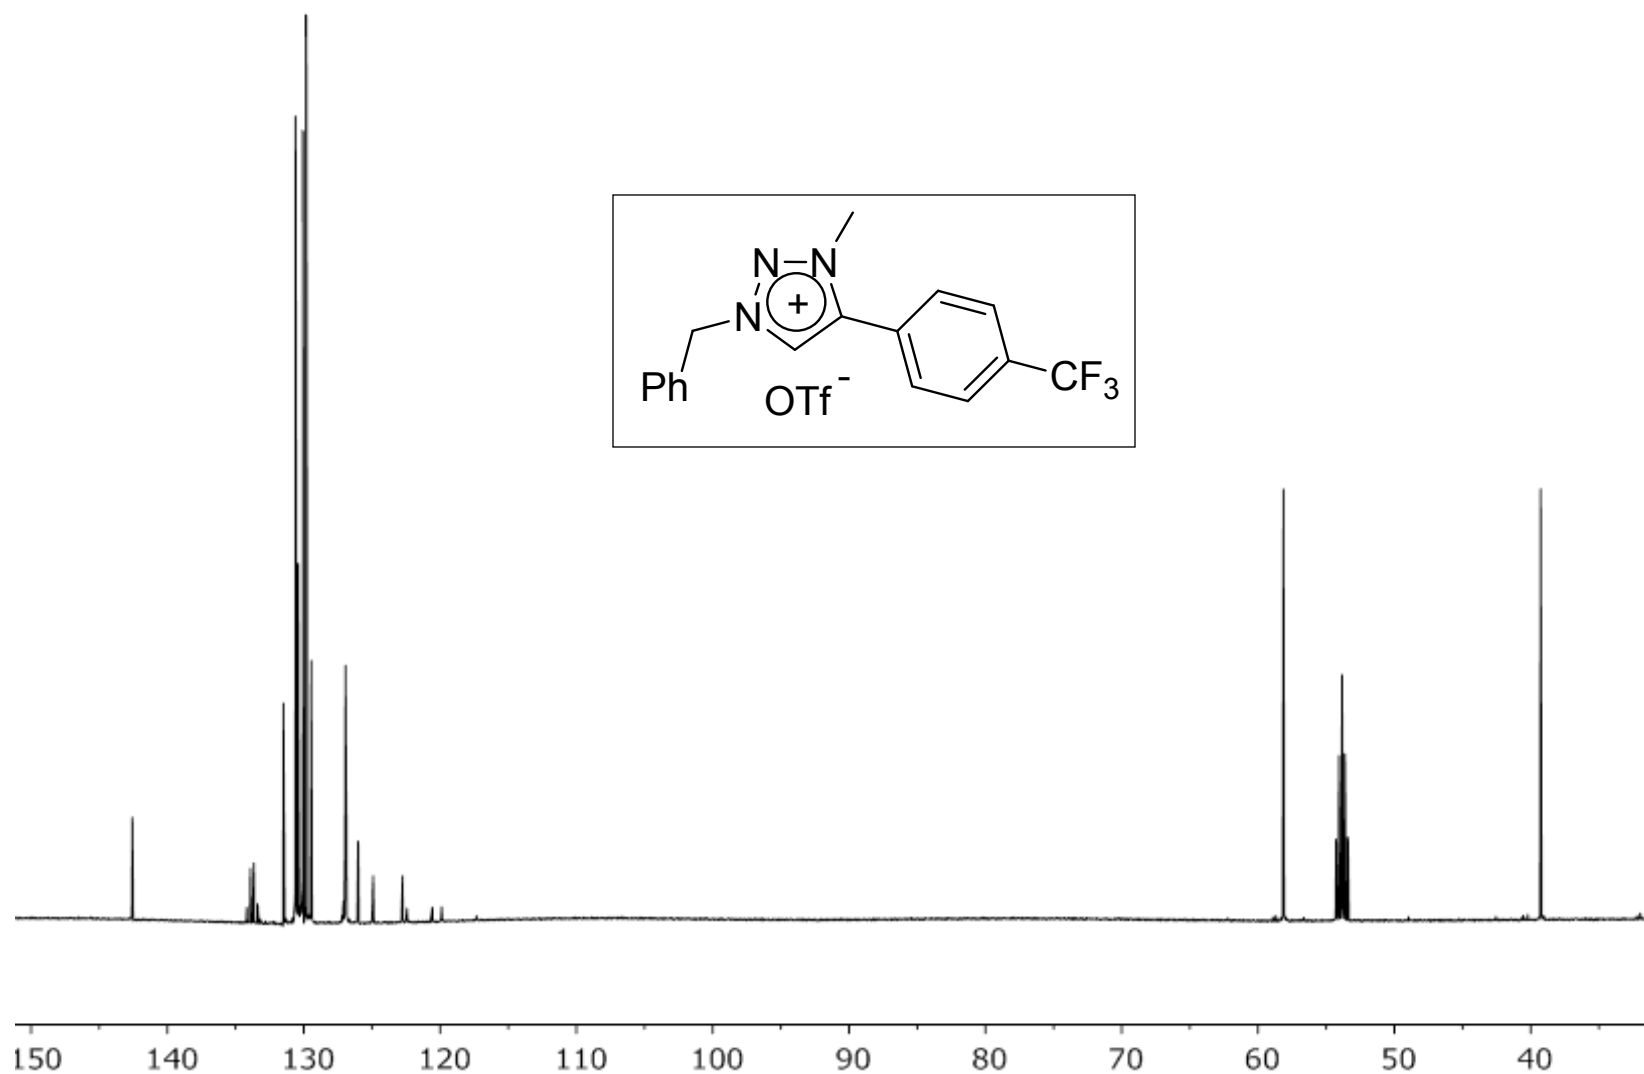

**Figure S2.**  $^{13}\text{C}$  NMR spectrum of  $[\text{PhCH}_2\text{N}_2(\text{NMe})\text{C}_2(\text{C}_6\text{H}_4\text{CF}_3)]^+[\text{OTf}]^-$  in  $\text{CD}_2\text{Cl}_2$  at r.t.

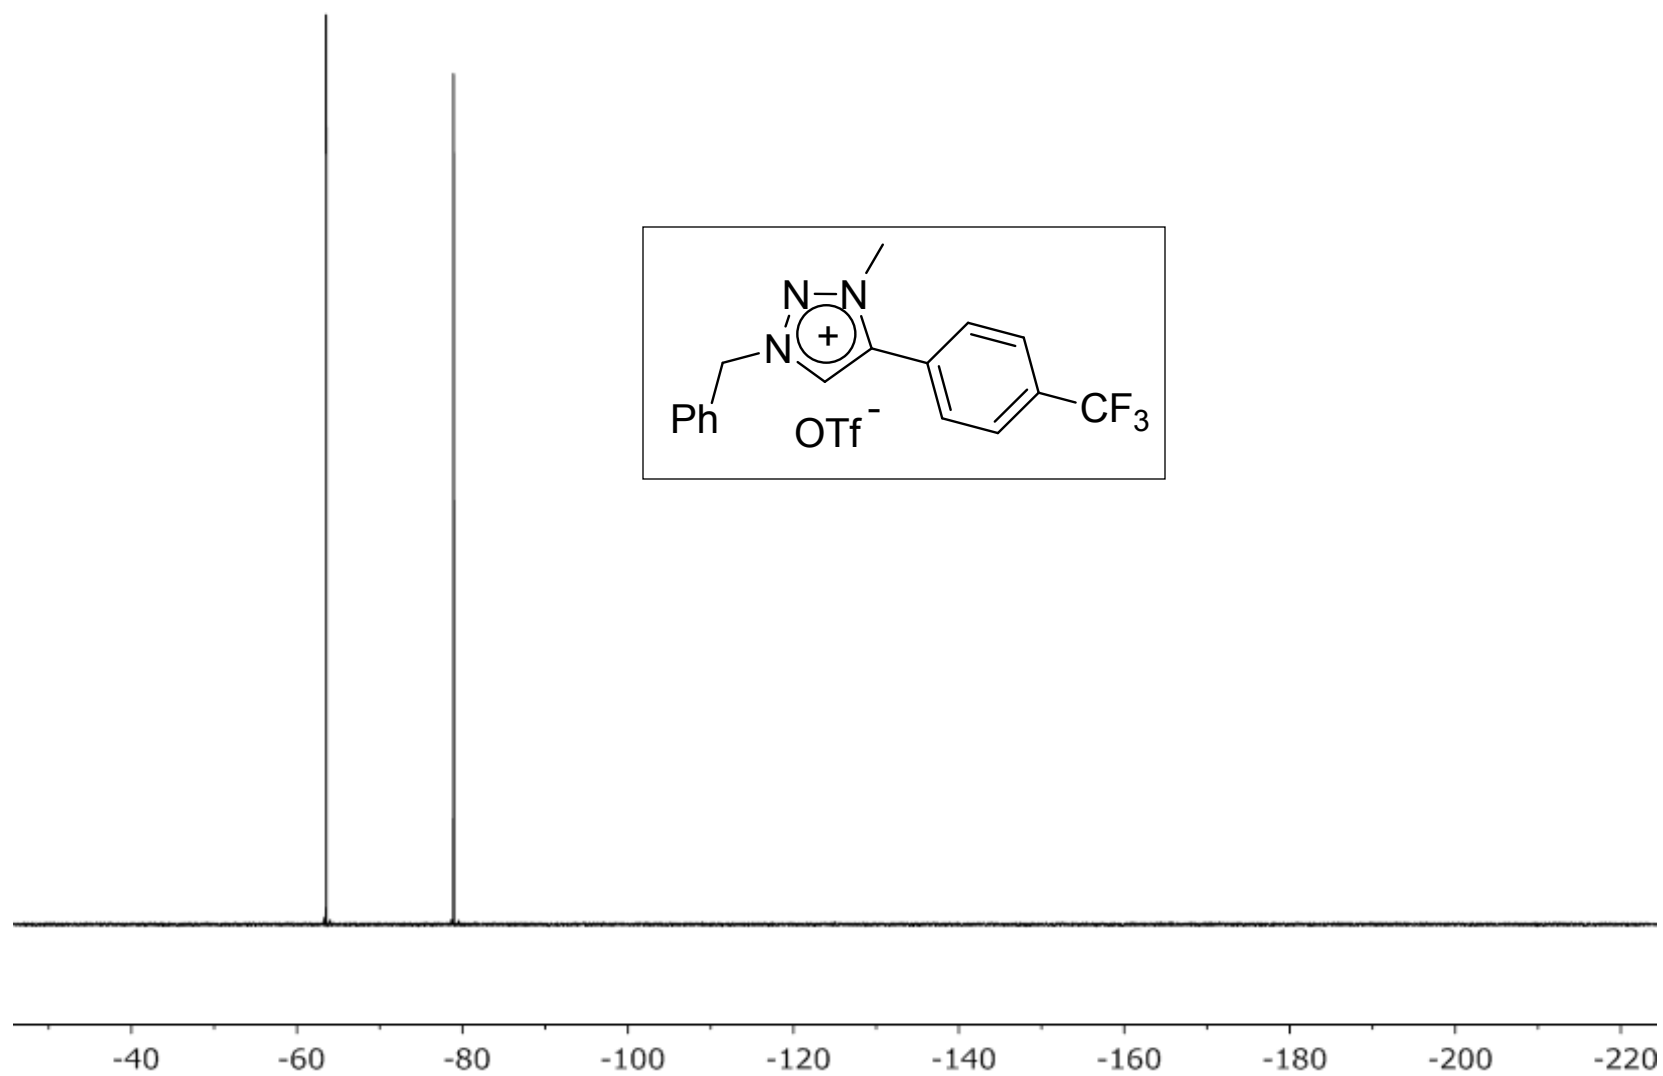

**Figure S3.**  $^{19}\text{F}$  NMR spectrum of  $[\text{PhCH}_2\text{N}_2(\text{NMe})\text{C}_2(\text{C}_6\text{H}_4\text{CF}_3)][\text{OTf}]$  in  $\text{CD}_2\text{Cl}_2$  at r.t.

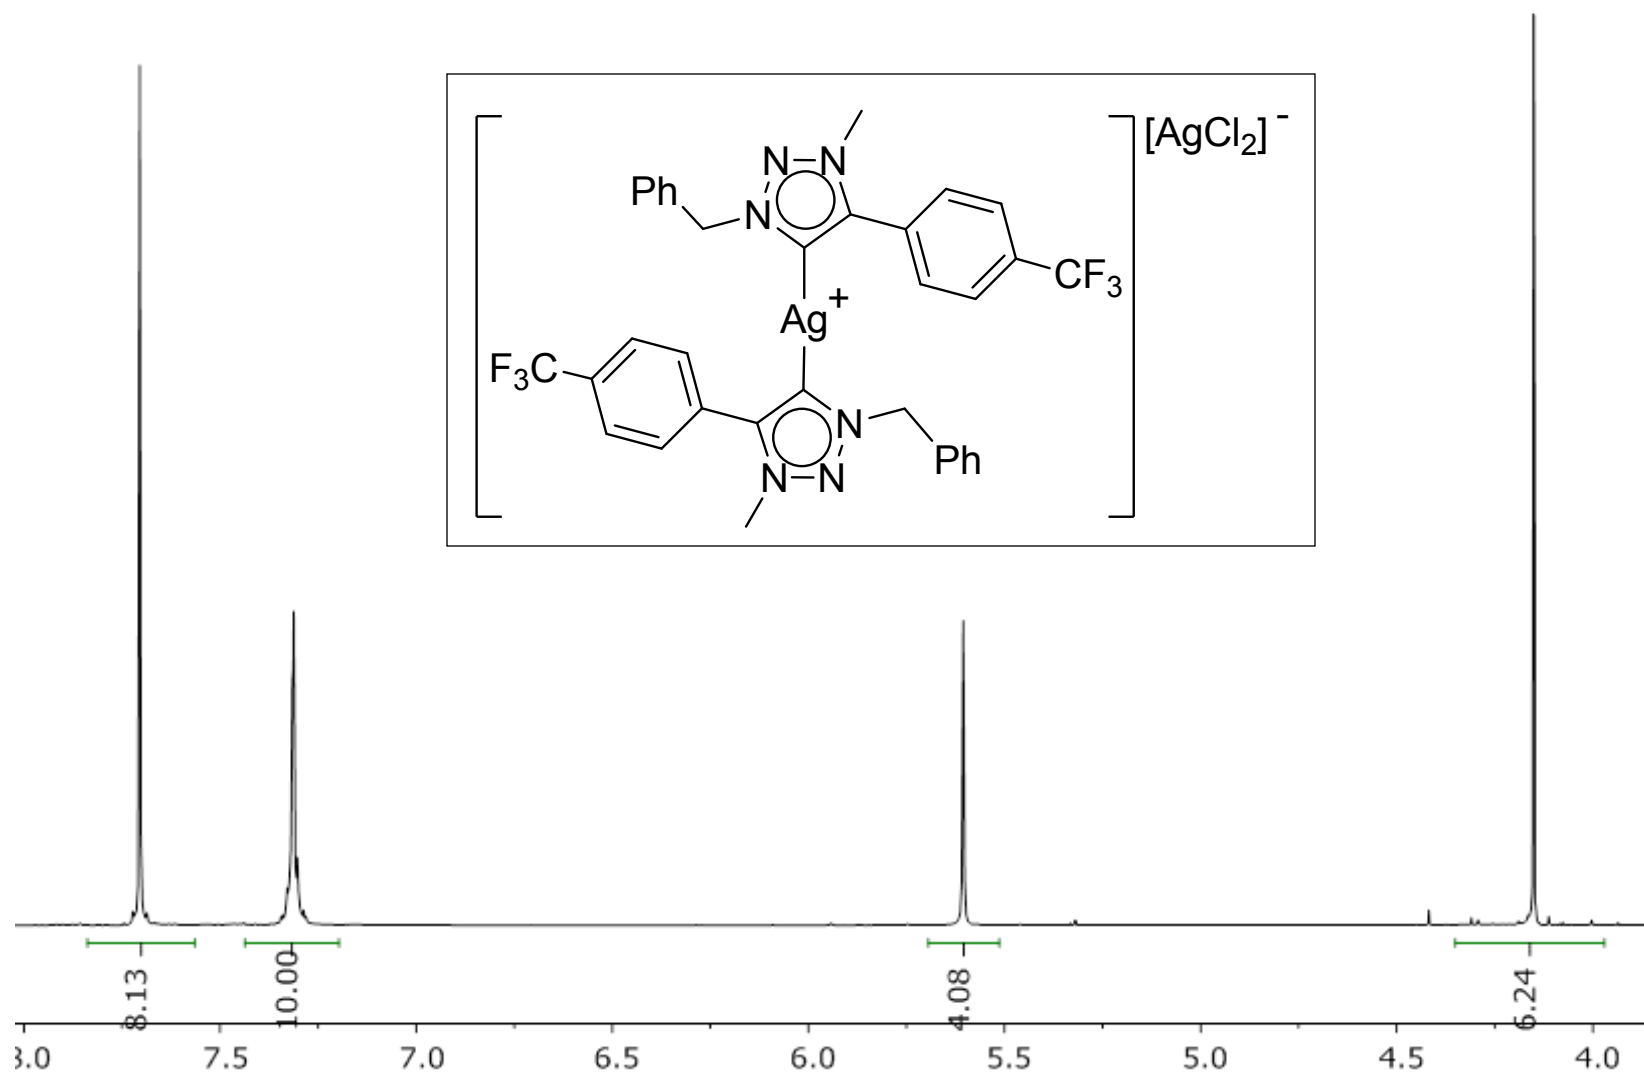

**Figure S4.**  $^1\text{H}$  NMR spectrum of **1a** in  $\text{CD}_2\text{Cl}_2$  at r.t.

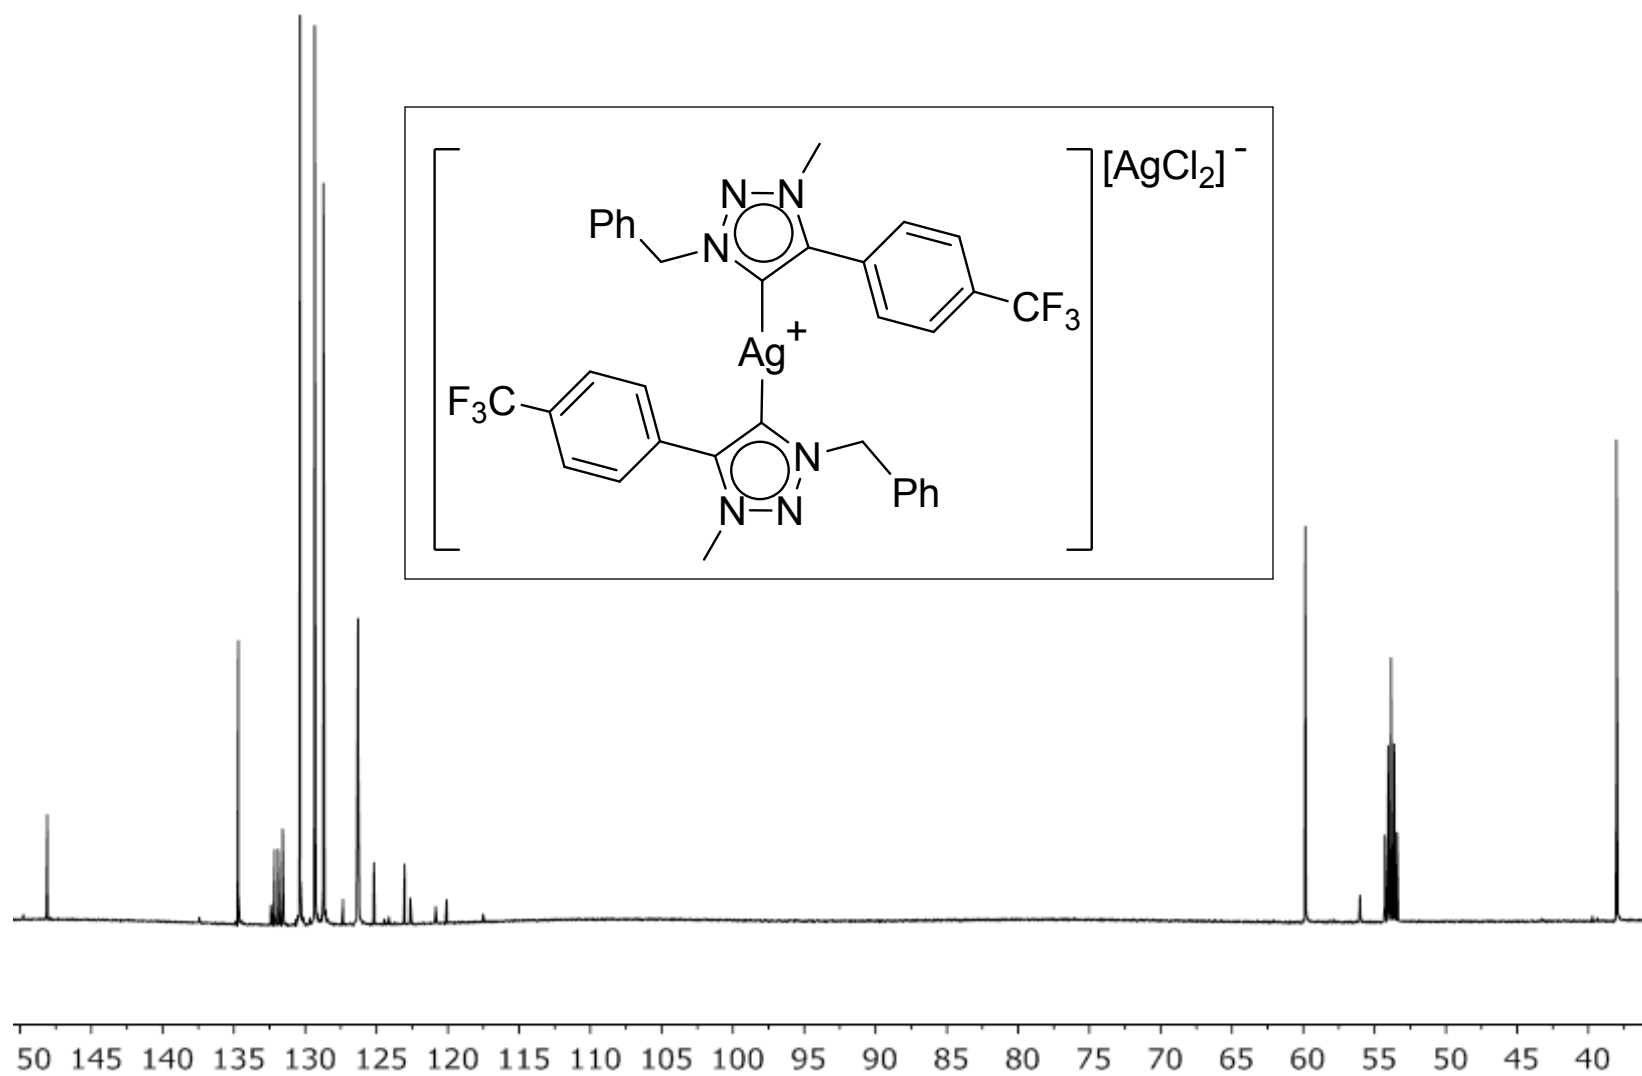

**Figure S5.**  $^{13}\text{C}$  NMR spectrum of **1a** in  $\text{CD}_2\text{Cl}_2$  at r.t.

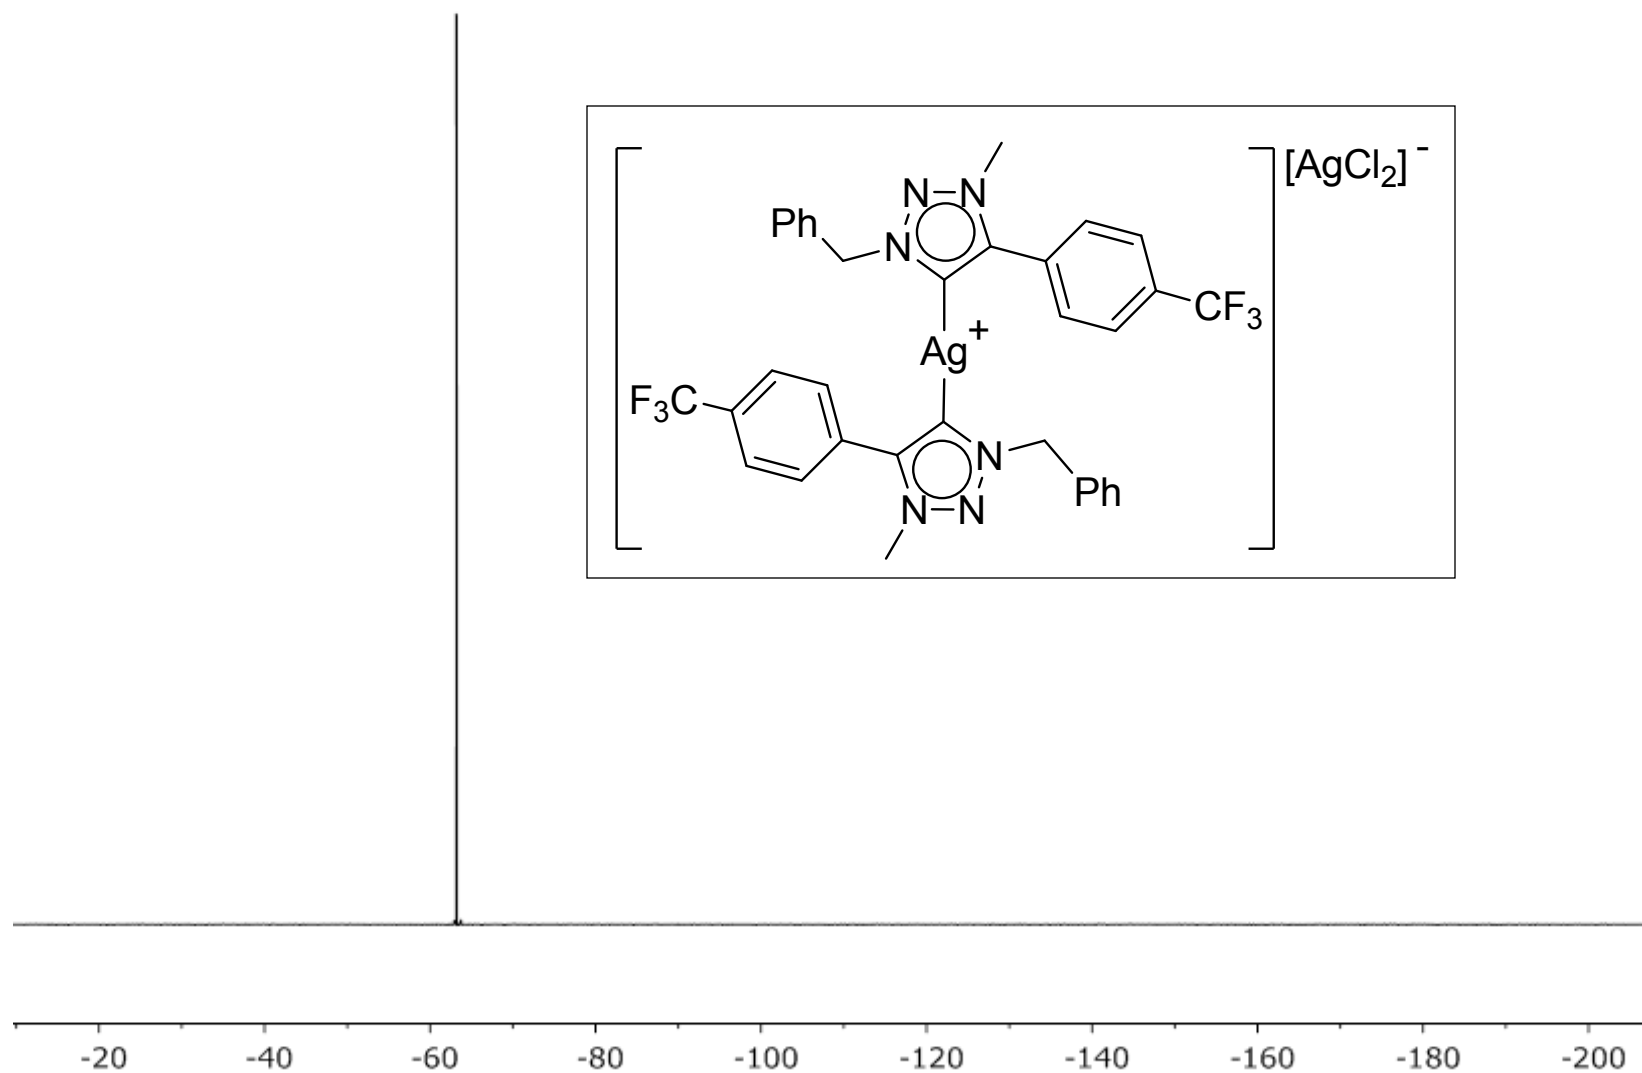

**Figure S6.**  $^{19}\text{F}$  NMR spectrum of **1a** in  $\text{CD}_2\text{Cl}_2$  at r.t.



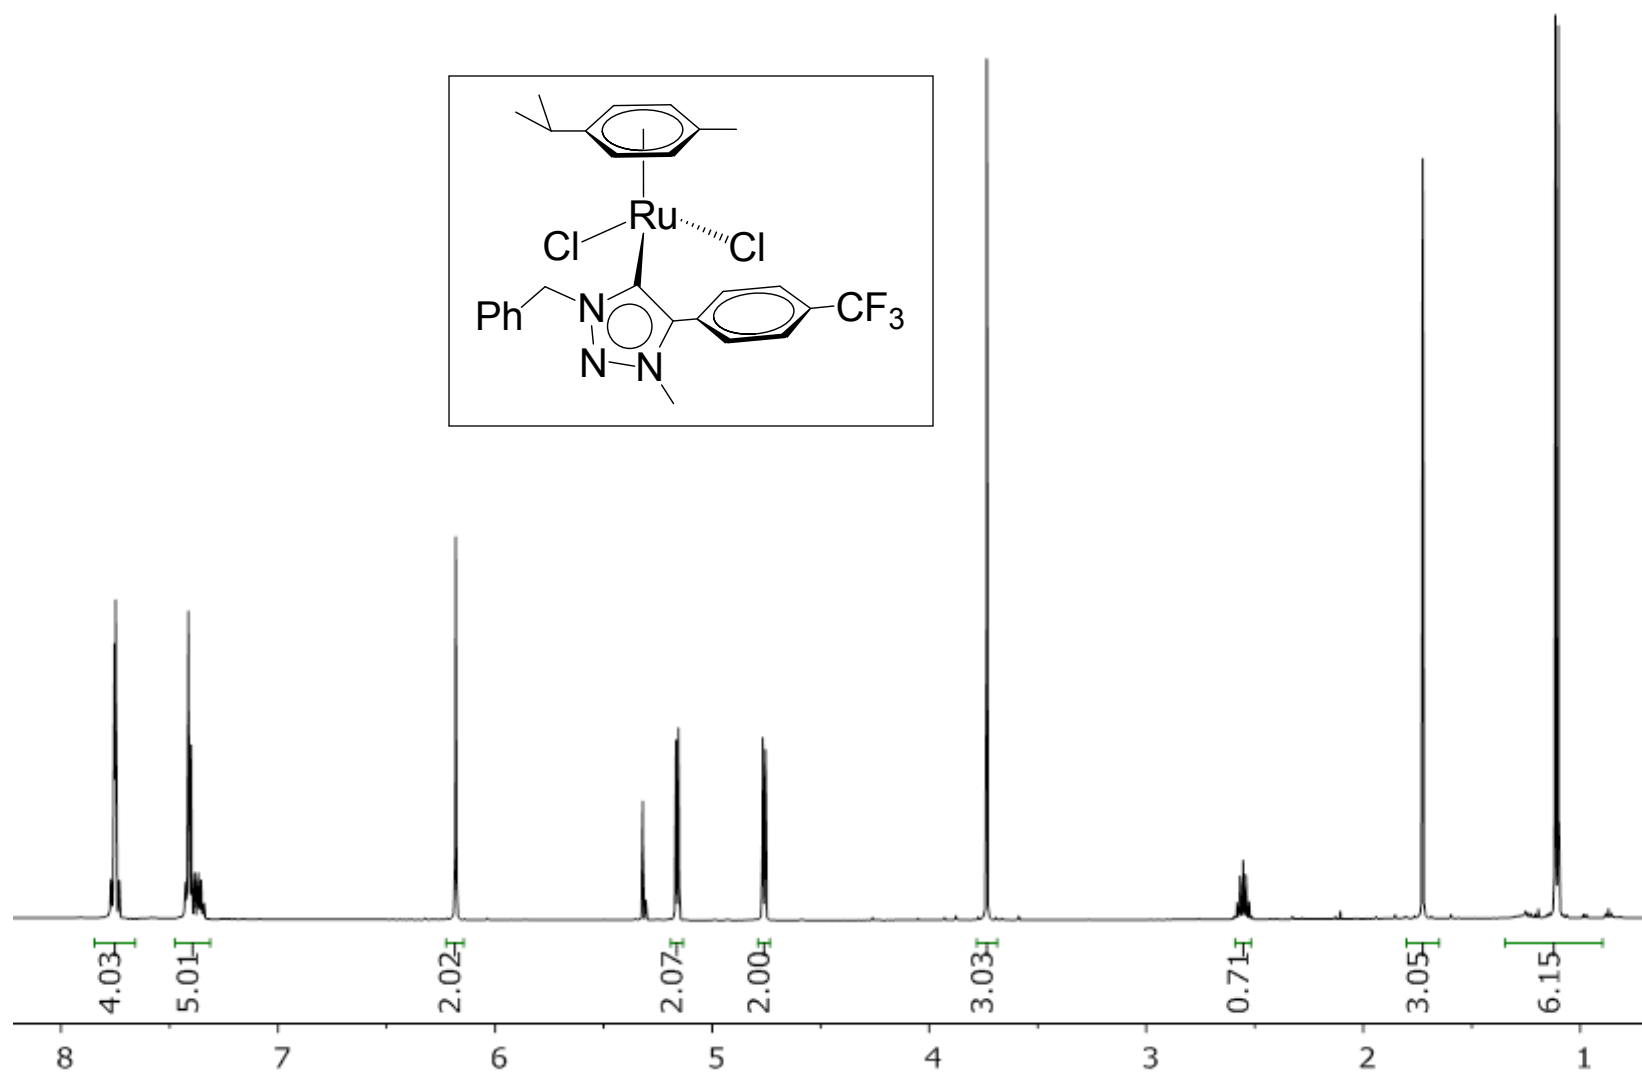

**Figure S7.**  $^1\text{H}$  NMR spectrum of **2a** in  $\text{CD}_2\text{Cl}_2$  at r.t.

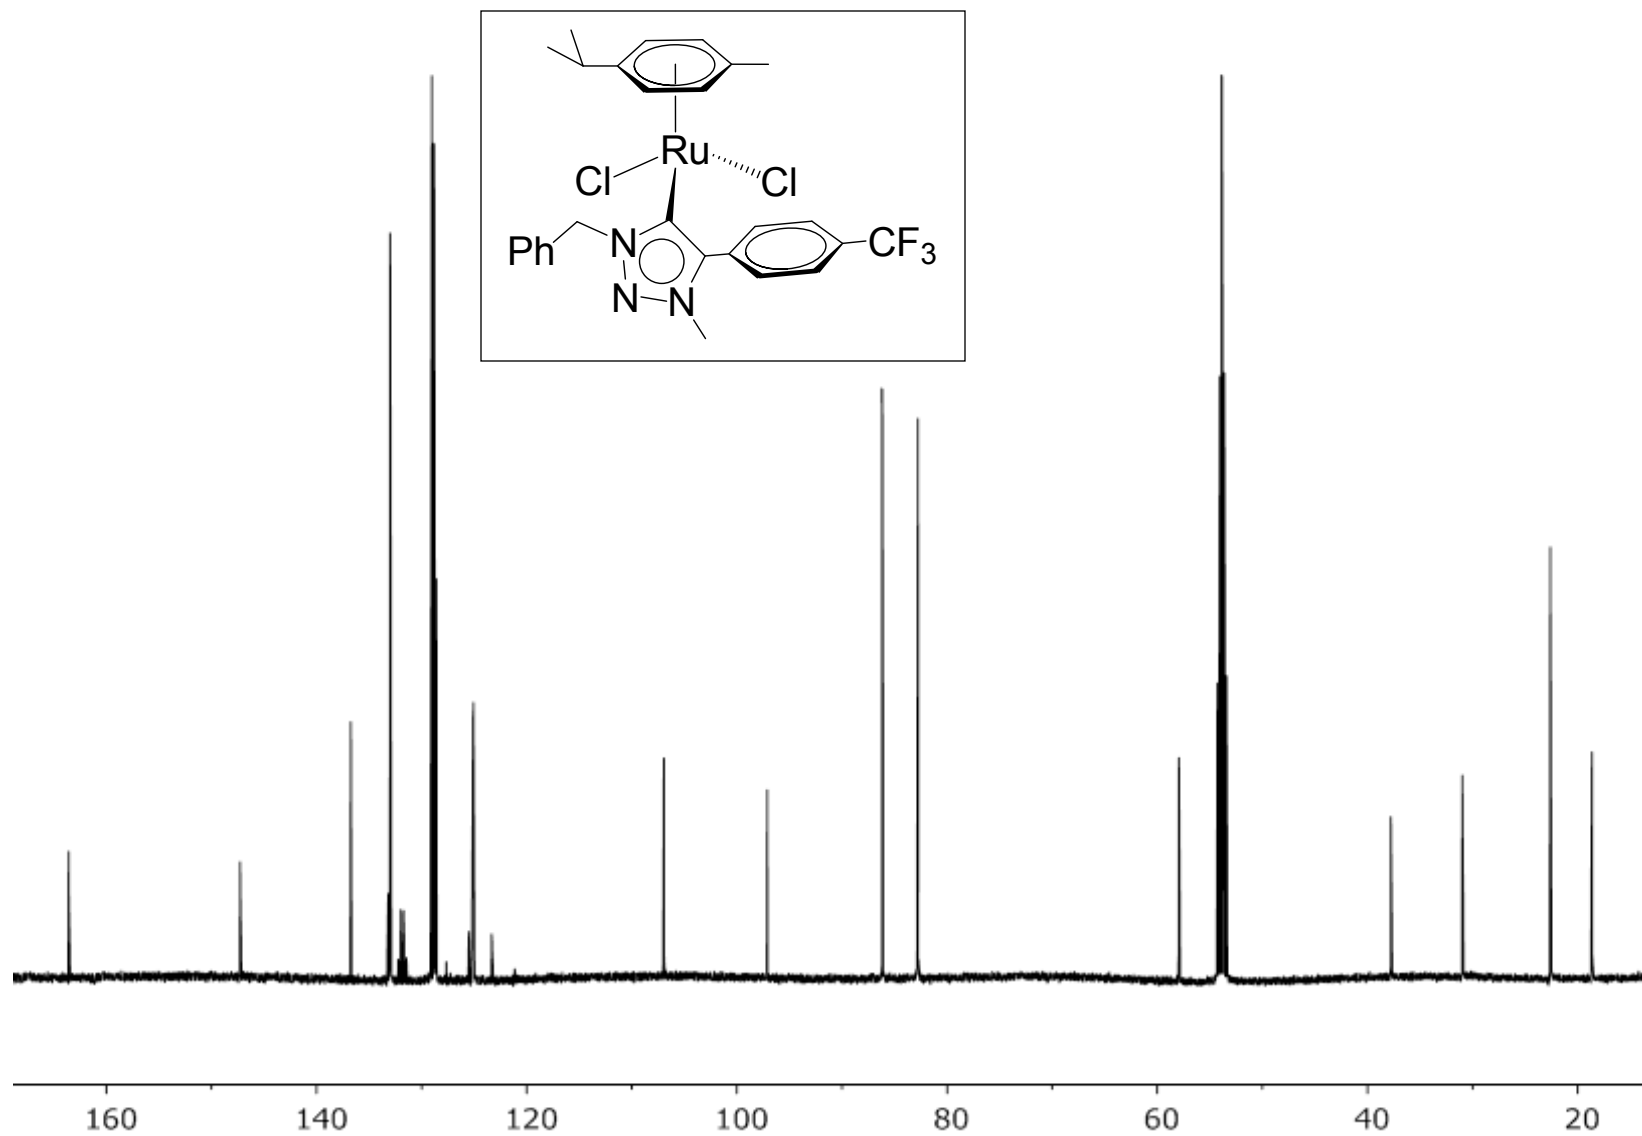

**Figure S8.**  $^{13}\text{C}$  NMR spectrum of **2a** in  $\text{CD}_2\text{Cl}_2$  at r.t.

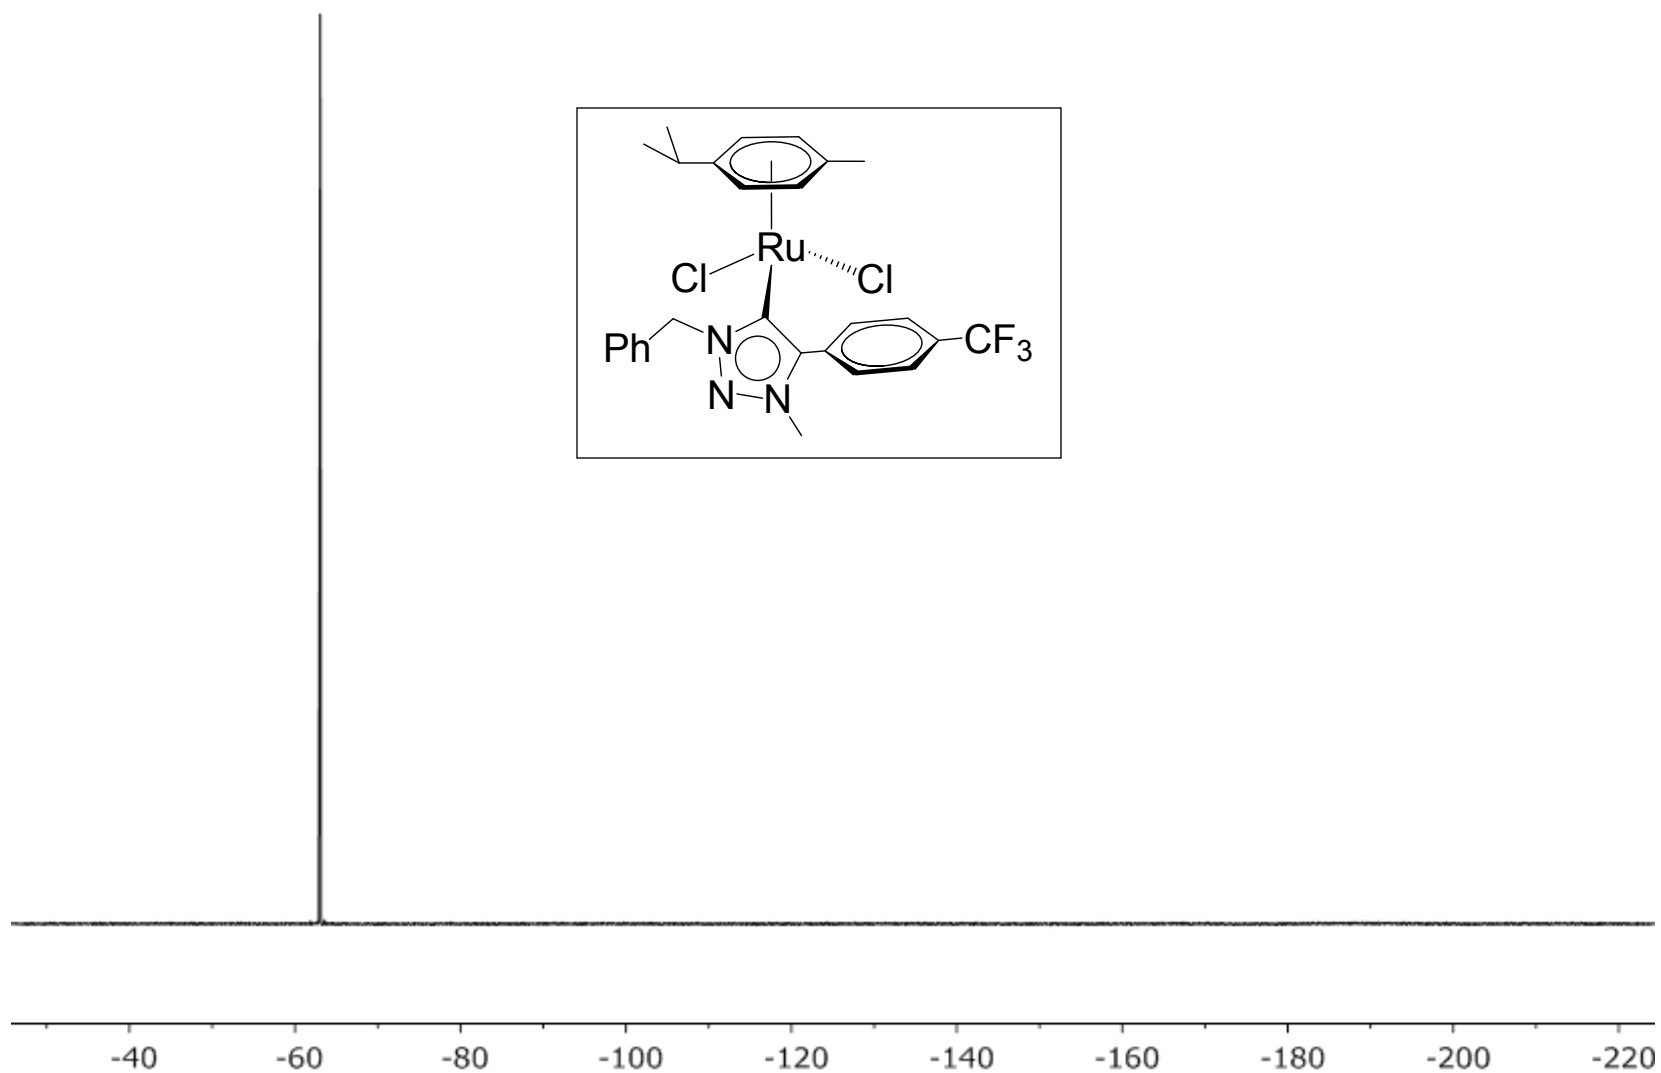

**Figure S9.**  $^{19}\text{F}$  NMR spectrum of **2a** in  $\text{CD}_2\text{Cl}_2$  at r.t.

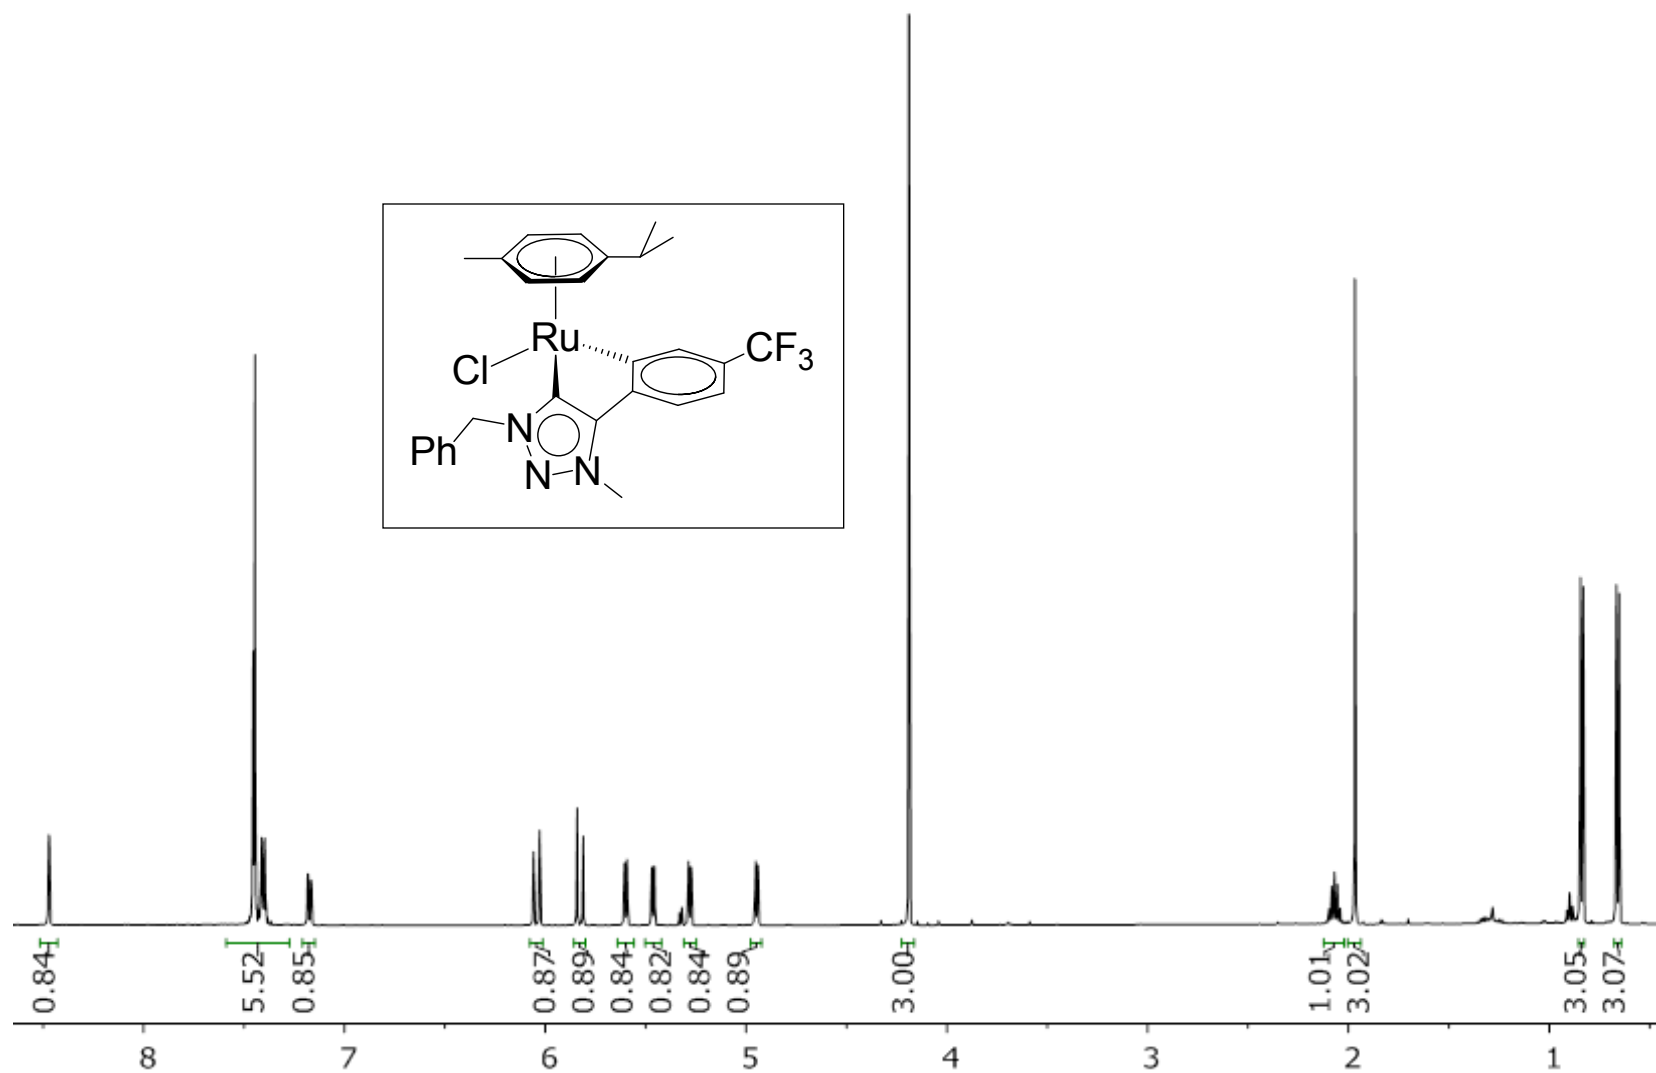

**Figure S10.**  $^1\text{H}$  NMR spectrum of **2a'** in  $\text{CD}_2\text{Cl}_2$  at r.t.

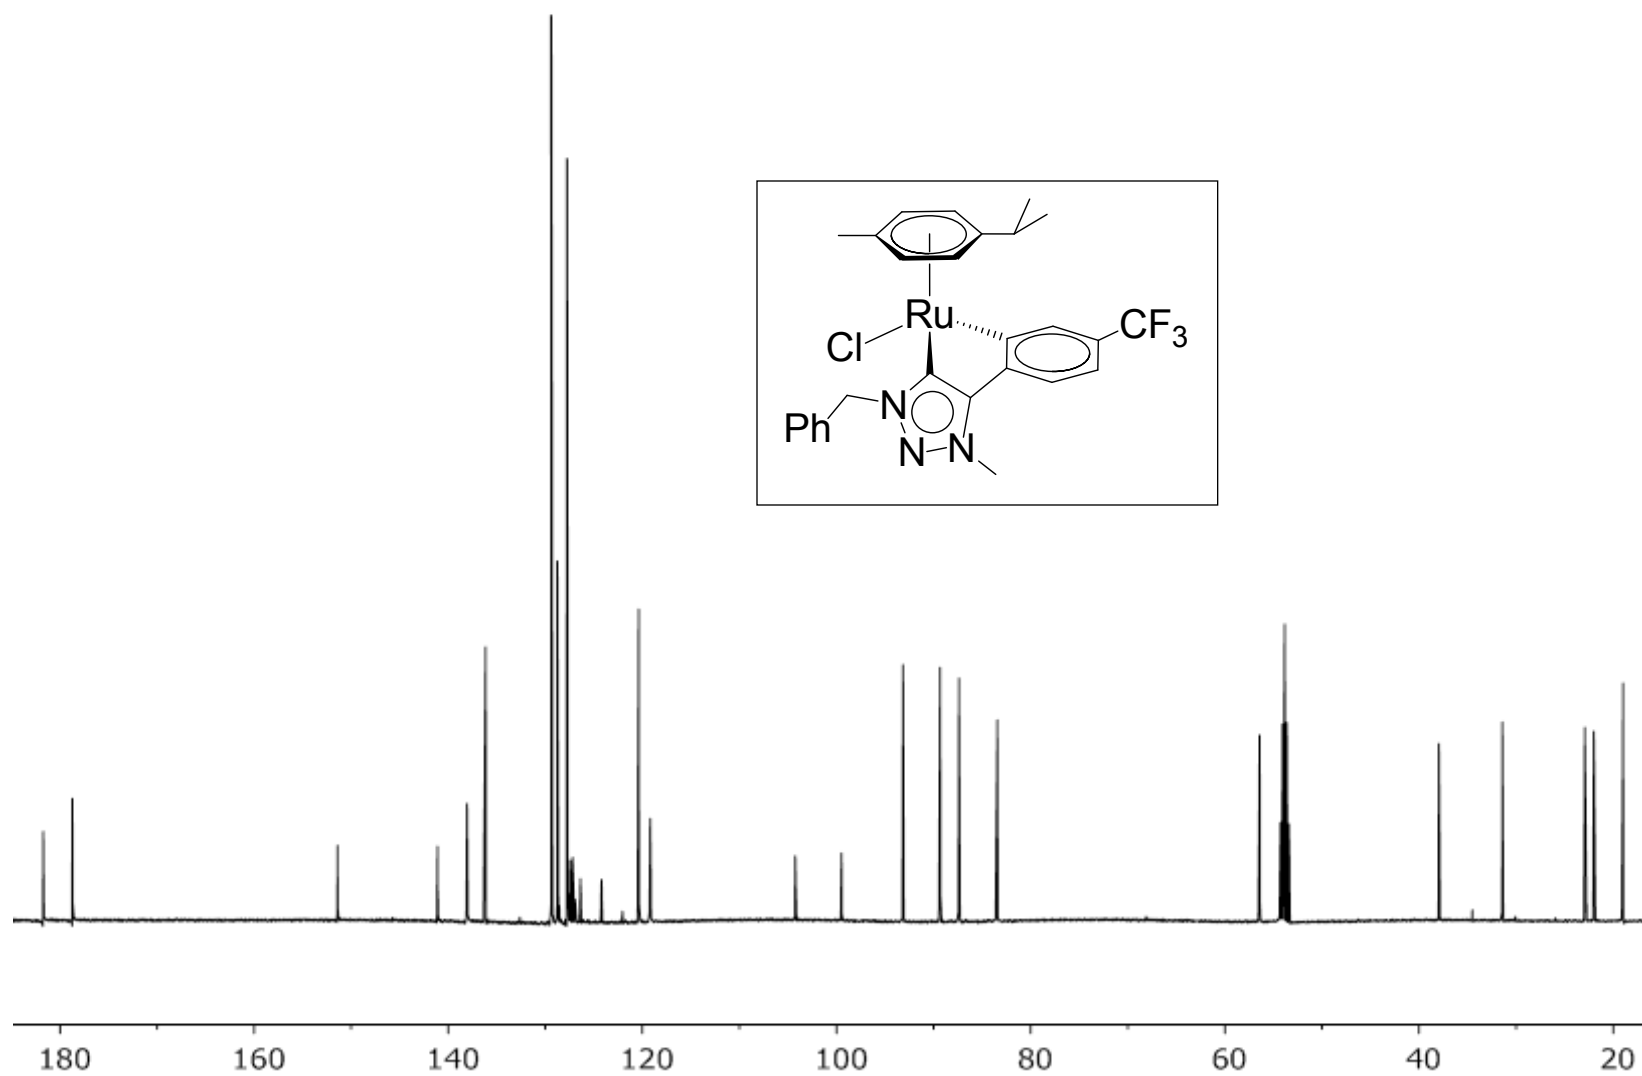

**Figure S11.**  $^{13}\text{C}$  NMR spectrum of **2a'** in  $\text{CD}_2\text{Cl}_2$  at r.t.

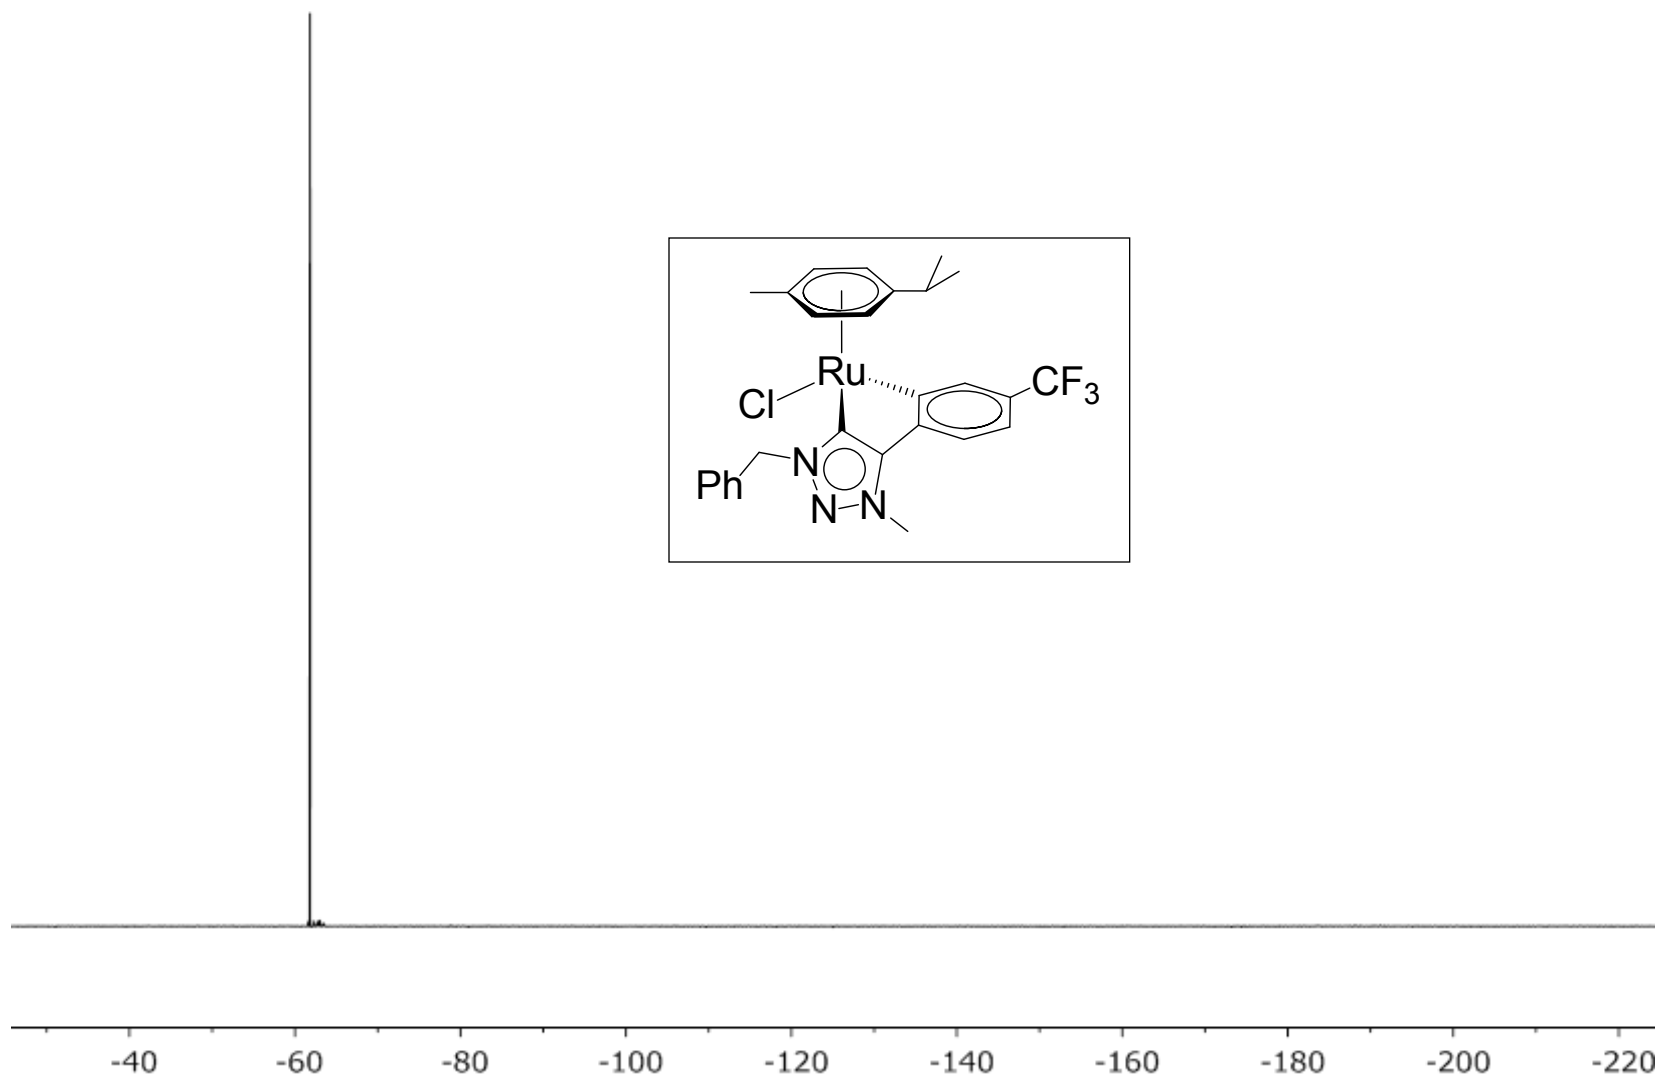

**Figure S12.**  $^{19}\text{F}$  NMR spectrum of **2a'** in  $\text{CD}_2\text{Cl}_2$  at r.t.

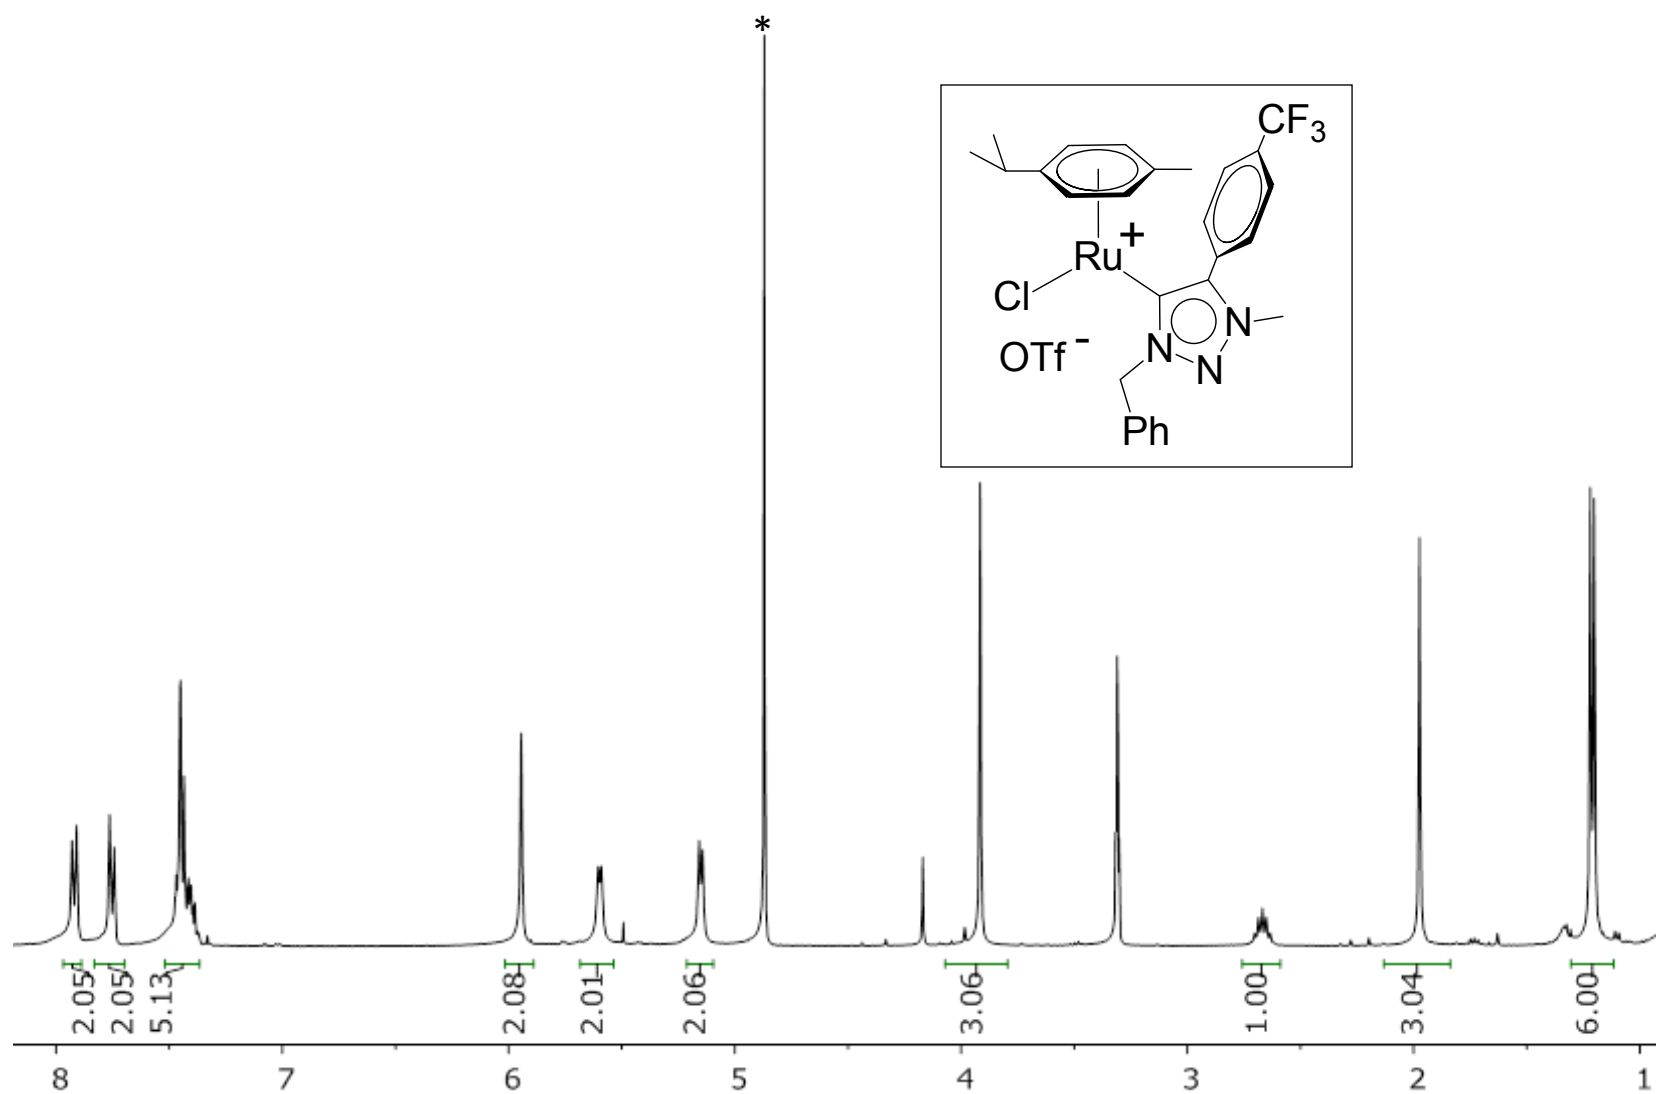

**Figure S13.**  $^1\text{H}$  NMR spectrum of **3a** in  $\text{CD}_3\text{OD}$  at r.t. (\* indicates water).

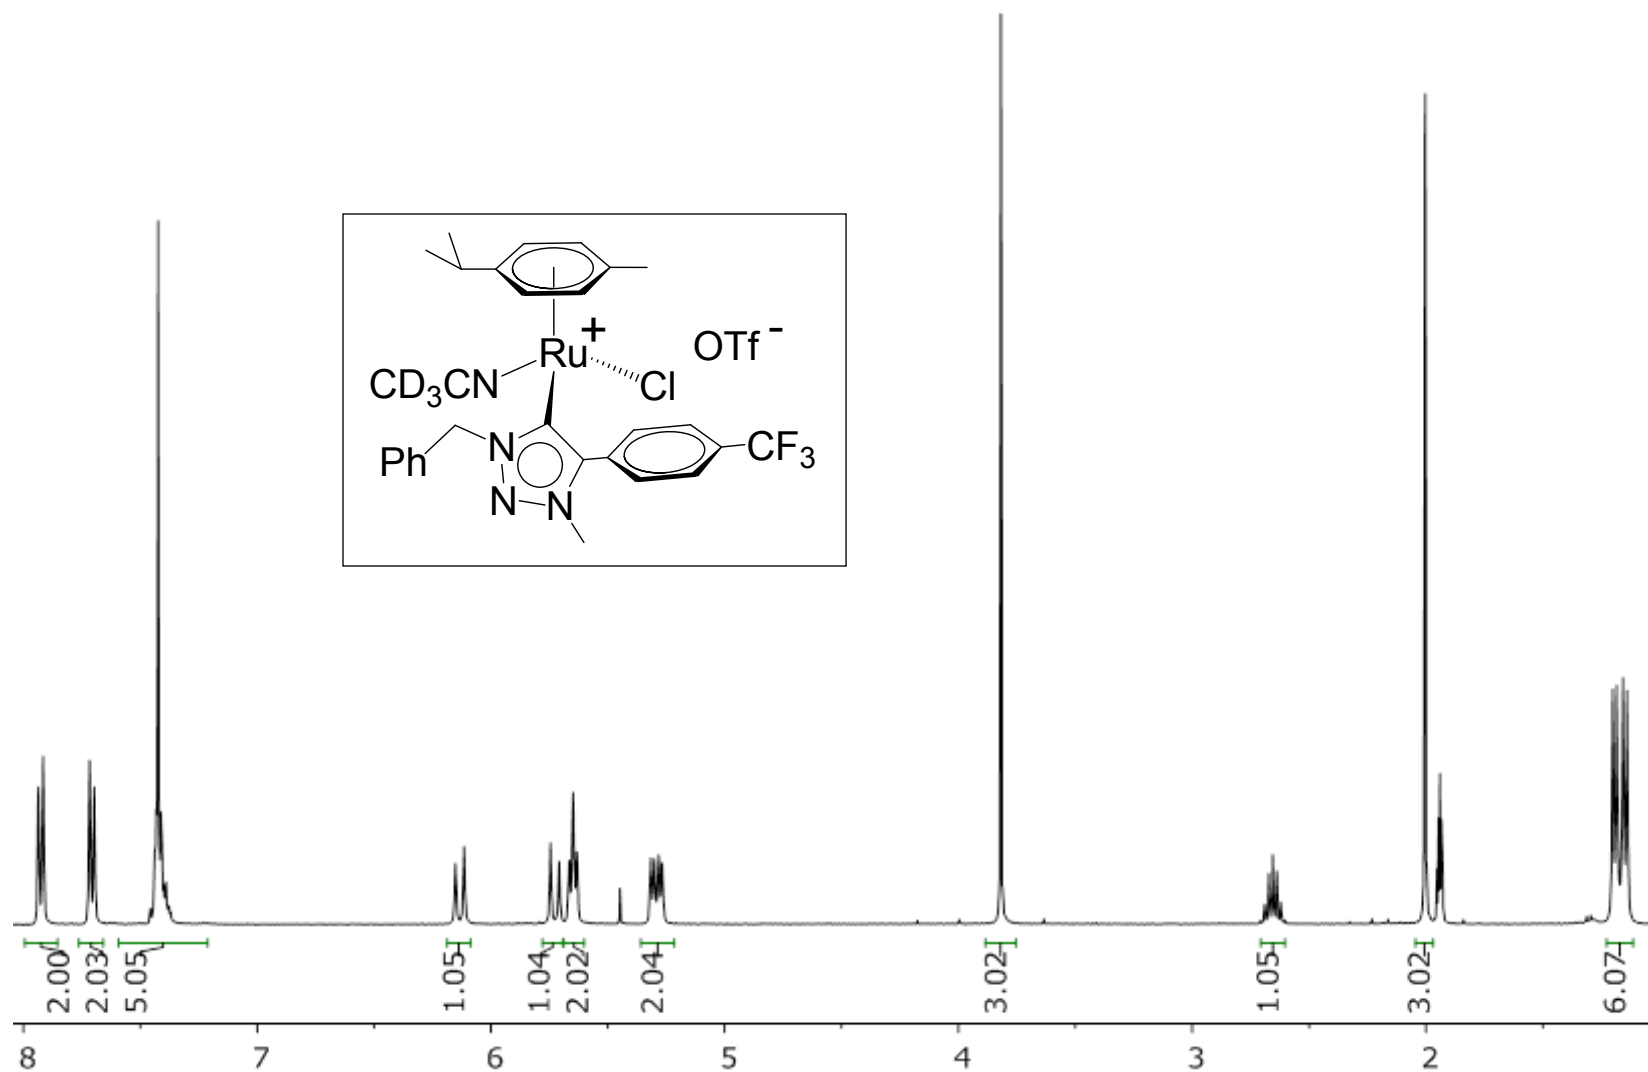

**Figure S14.**  $^1\text{H}$  NMR spectrum of **4a** in  $\text{CD}_3\text{CN}$  at r.t.



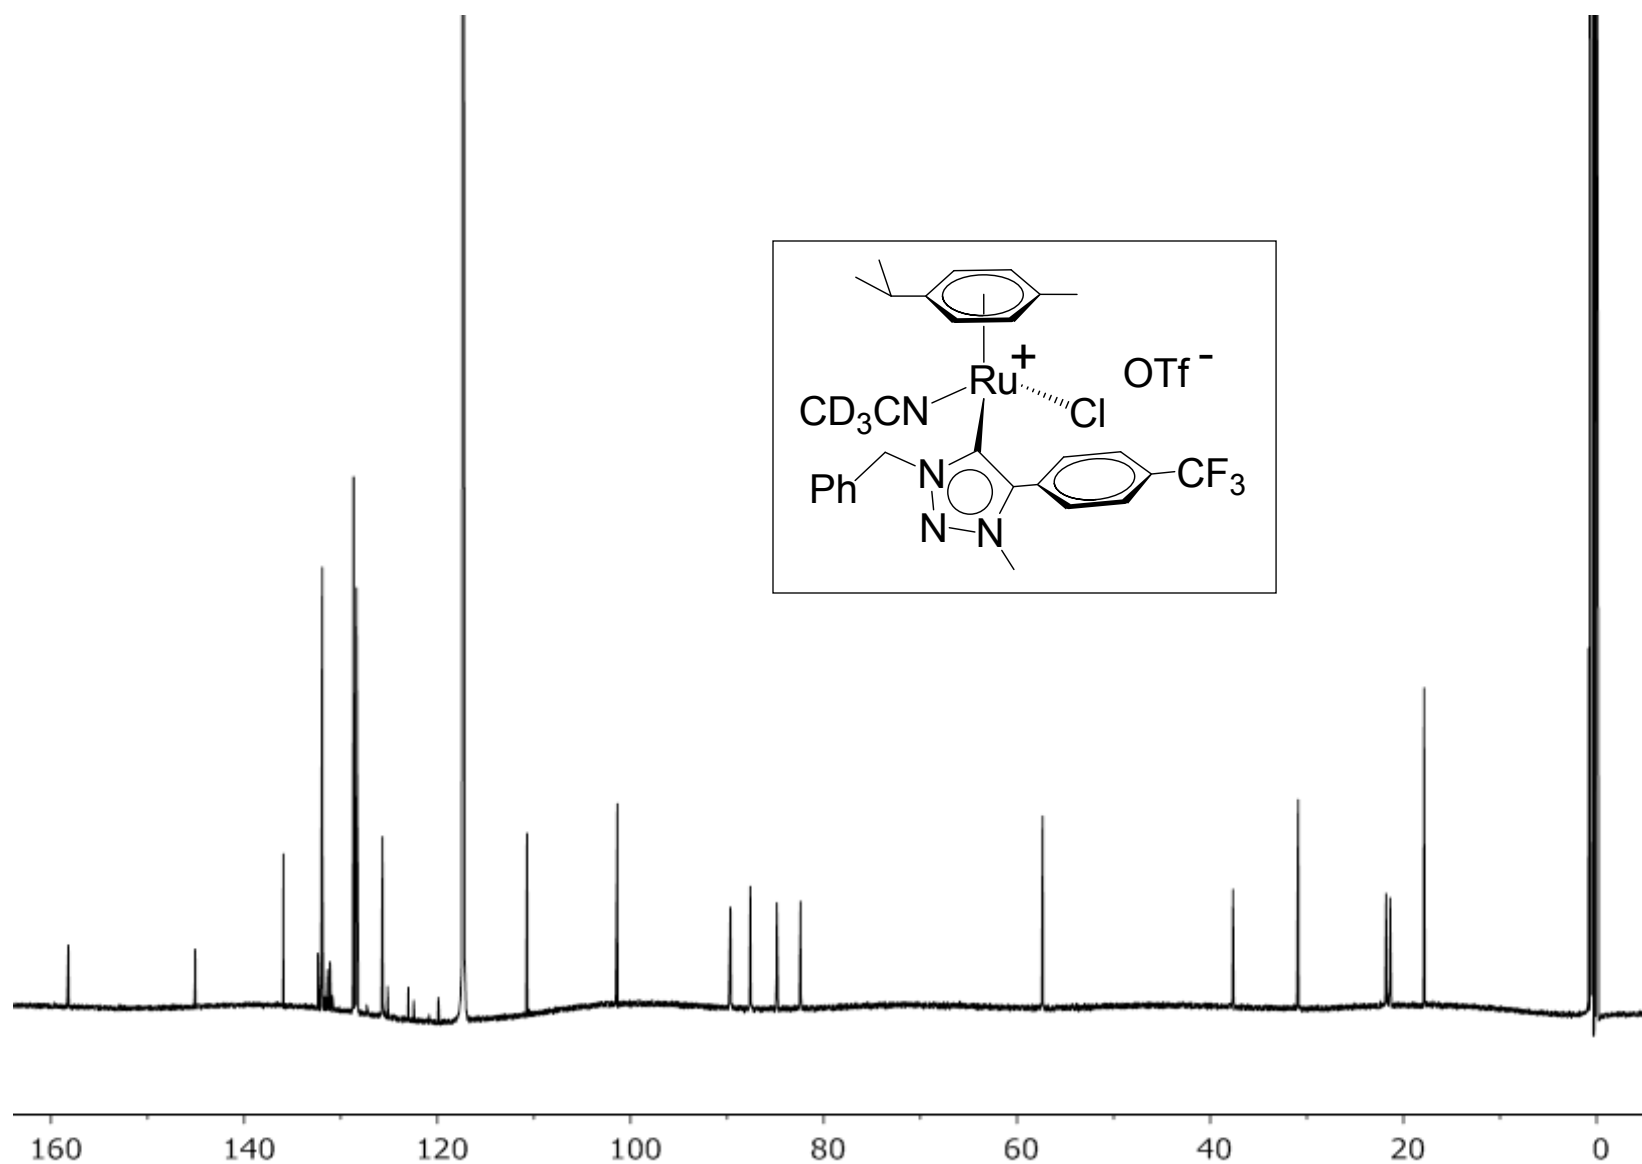

**Figure S15.**  $^{13}\text{C}$  NMR spectrum of **4a** in  $\text{CD}_3\text{CN}$  at r.t.

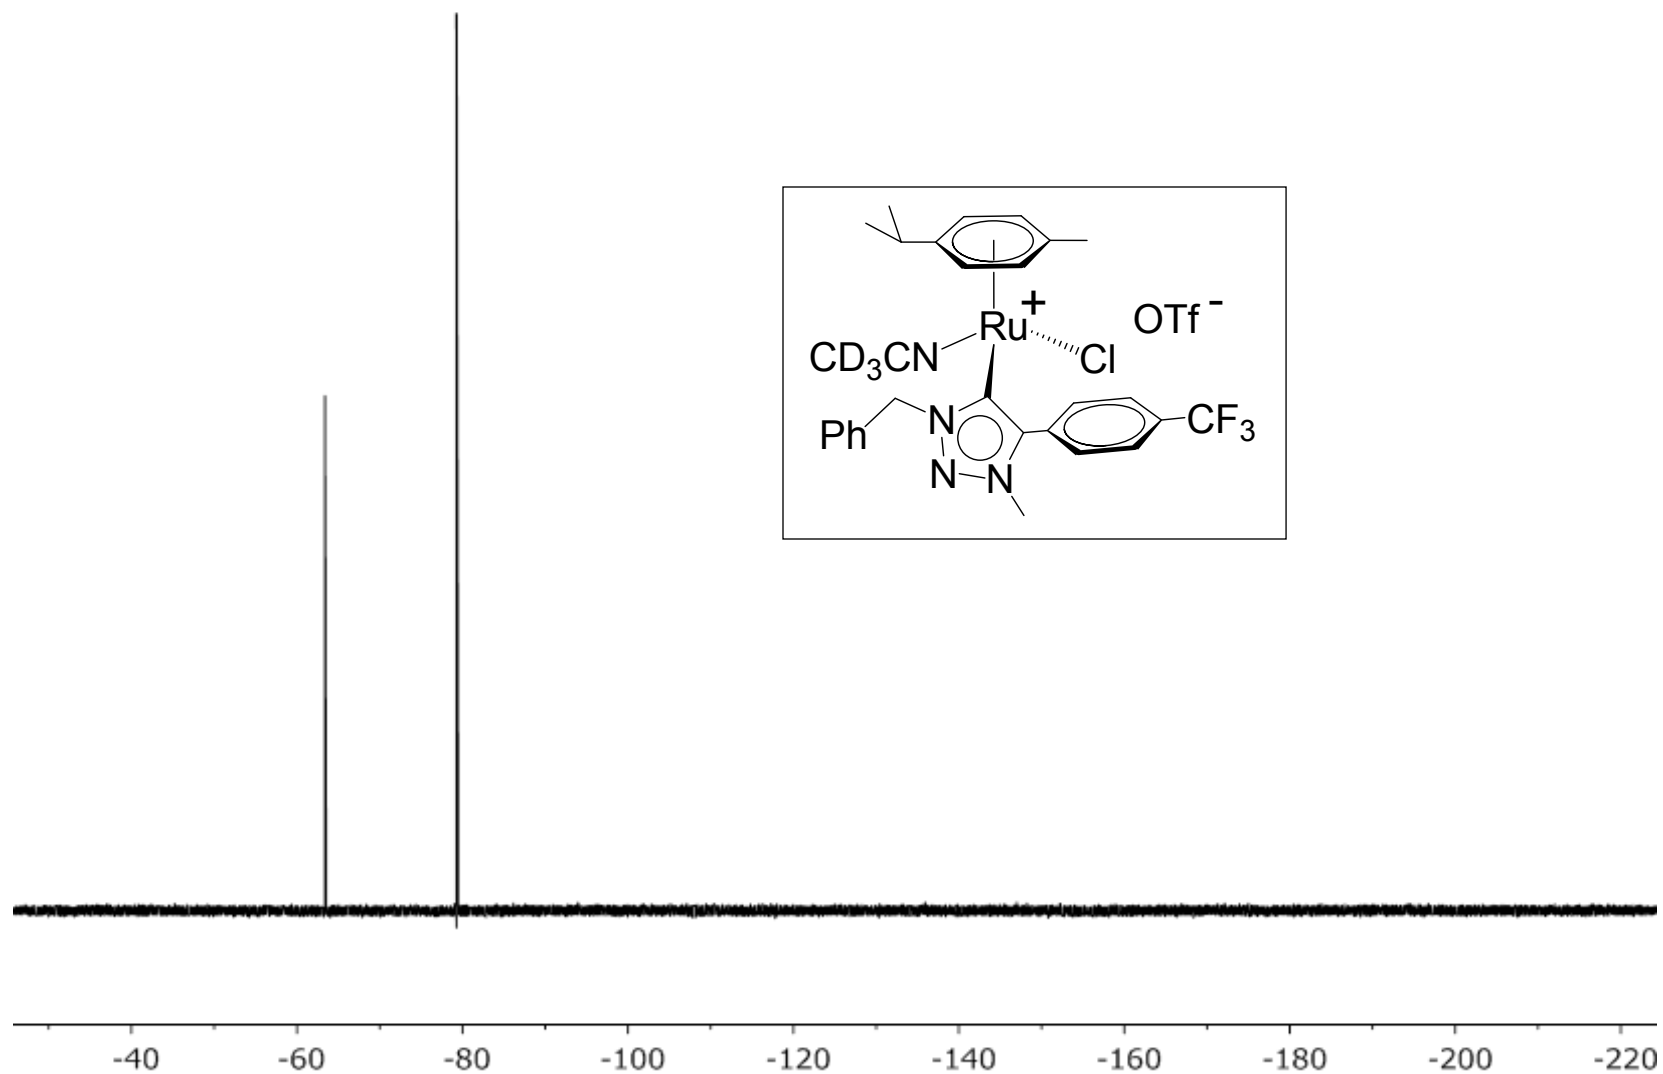

**Figure S16.**  $^{19}\text{F}$  NMR spectrum of **4a** in  $\text{CD}_3\text{CN}$  at r.t.

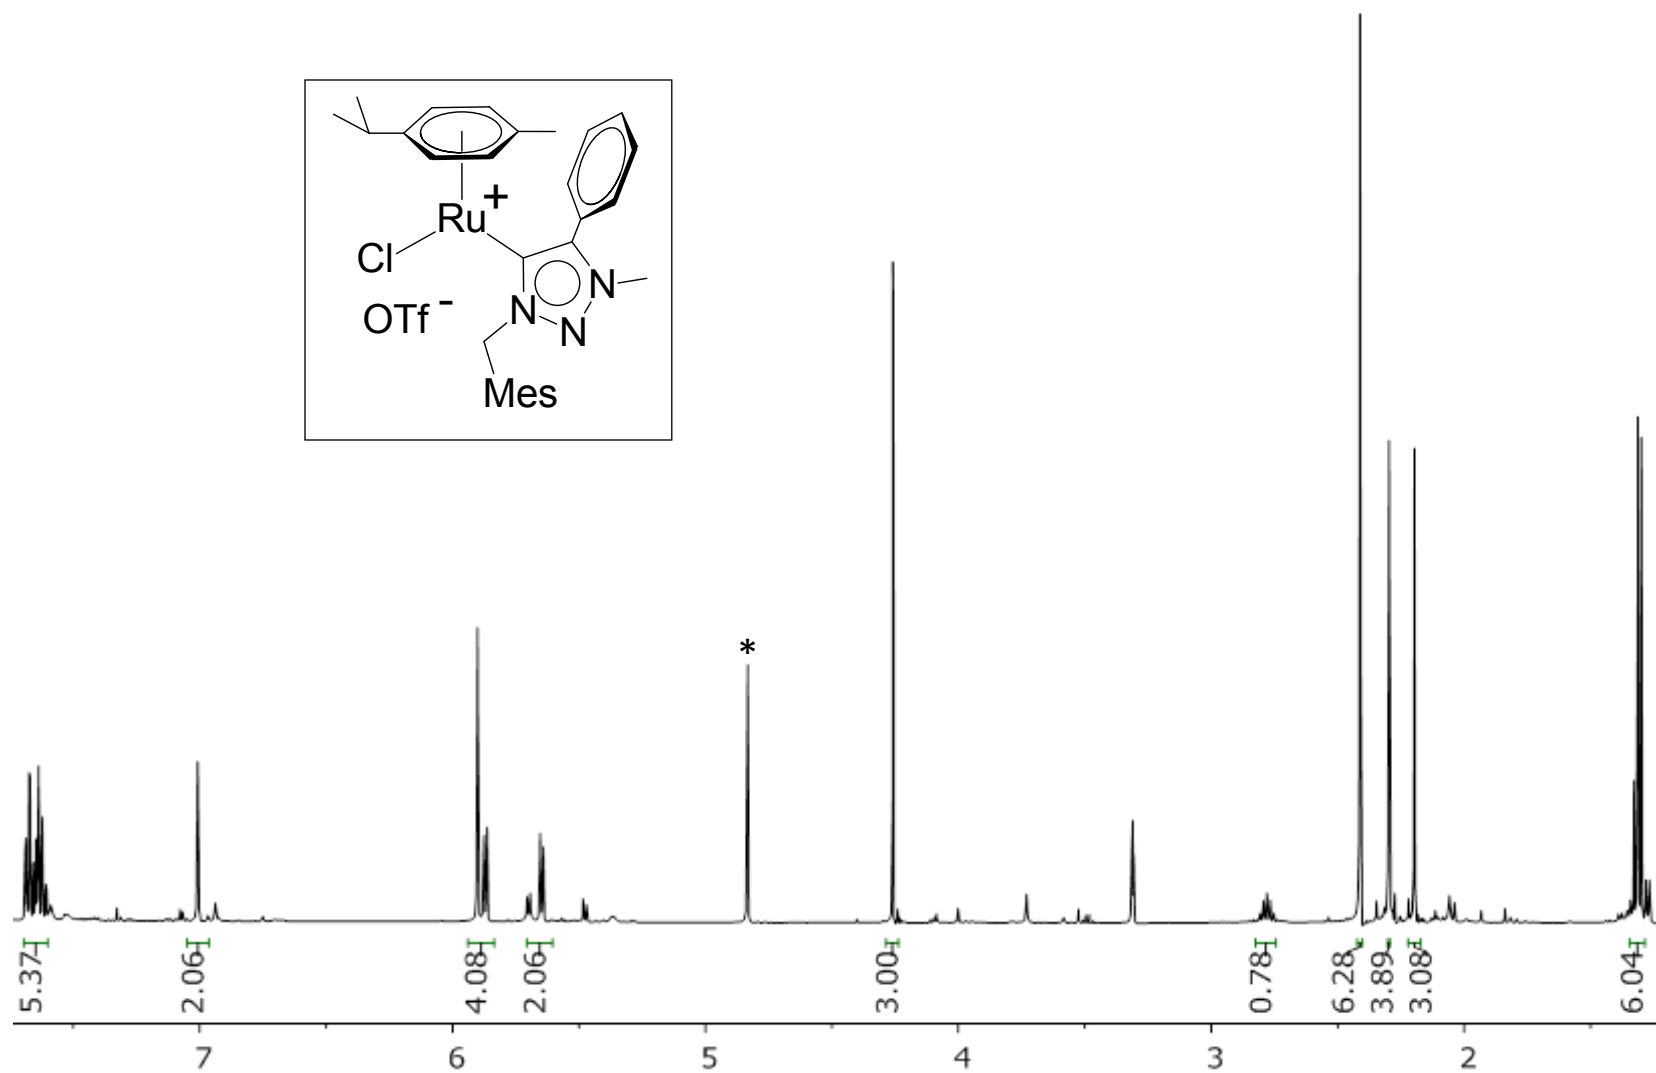

**Figure S17.**  $^1\text{H}$  NMR spectrum of **3b** in  $\text{CD}_3\text{OD}$  at r.t. (\* indicates water).

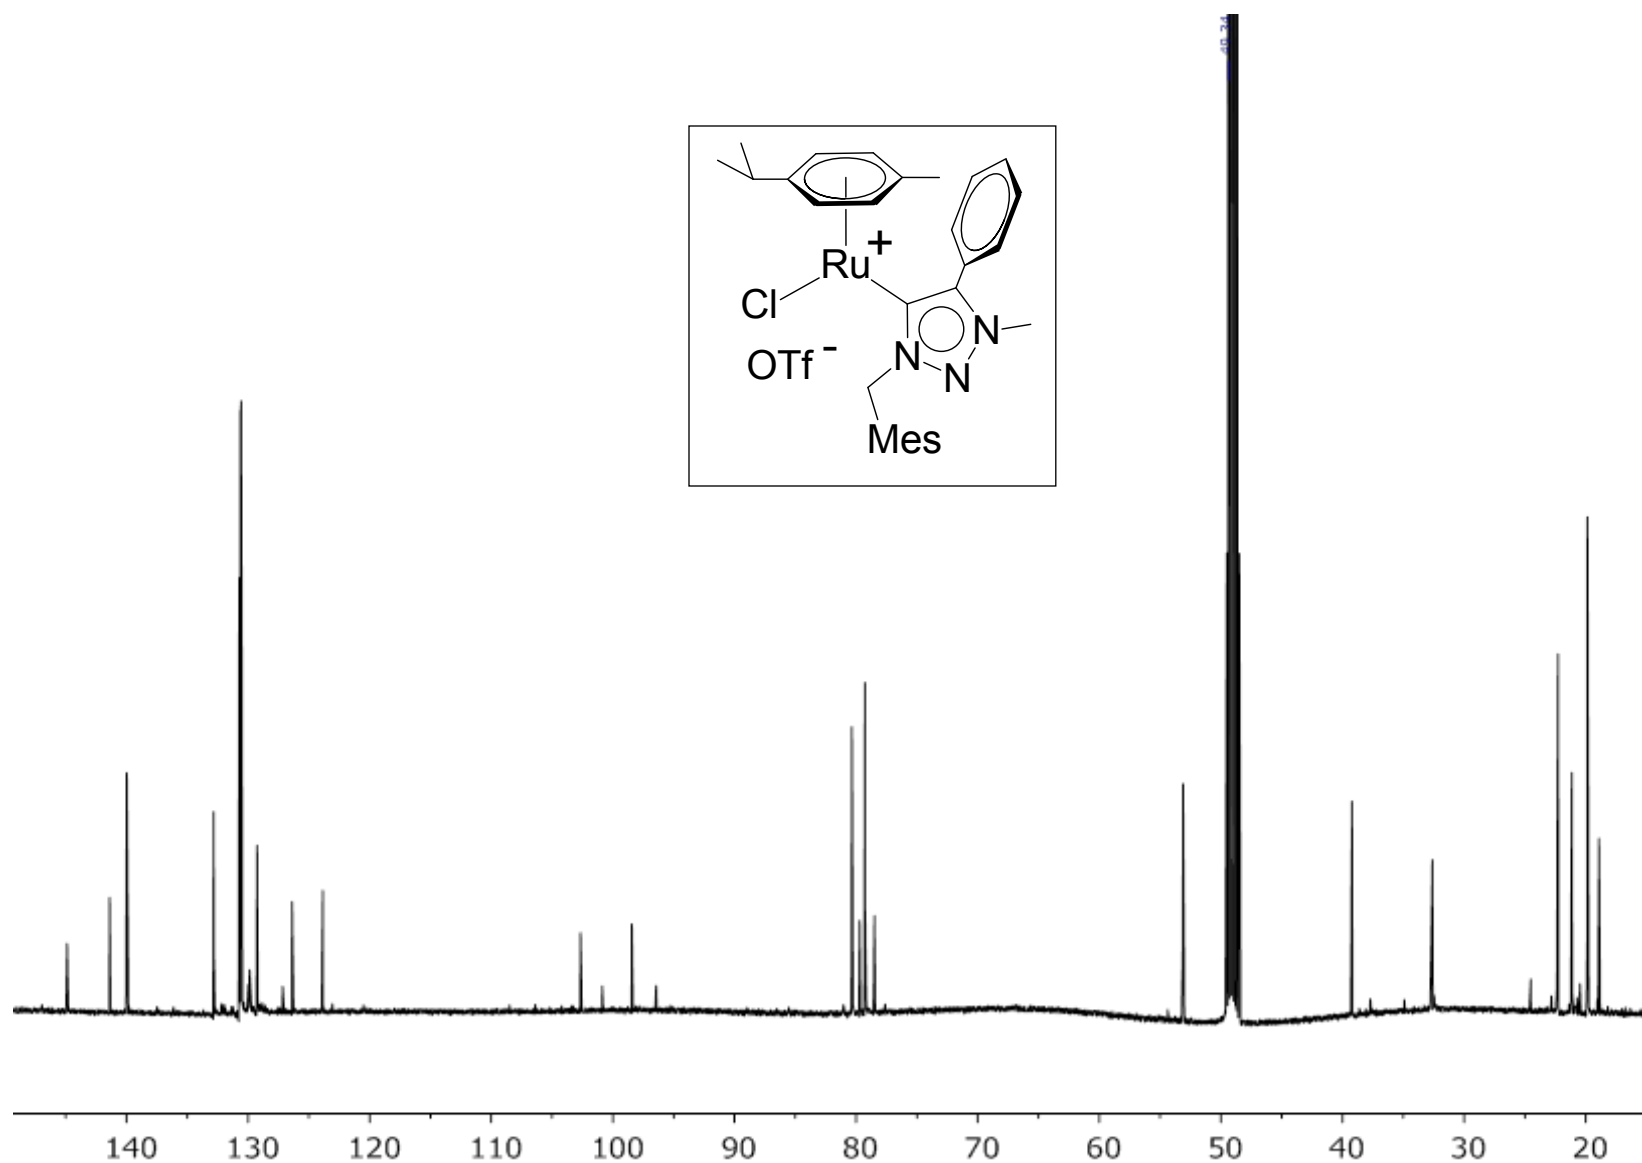

**Figure S18.**  $^{13}\text{C}$  NMR spectrum of **3b** in  $\text{CD}_3\text{OD}$  at r.t.

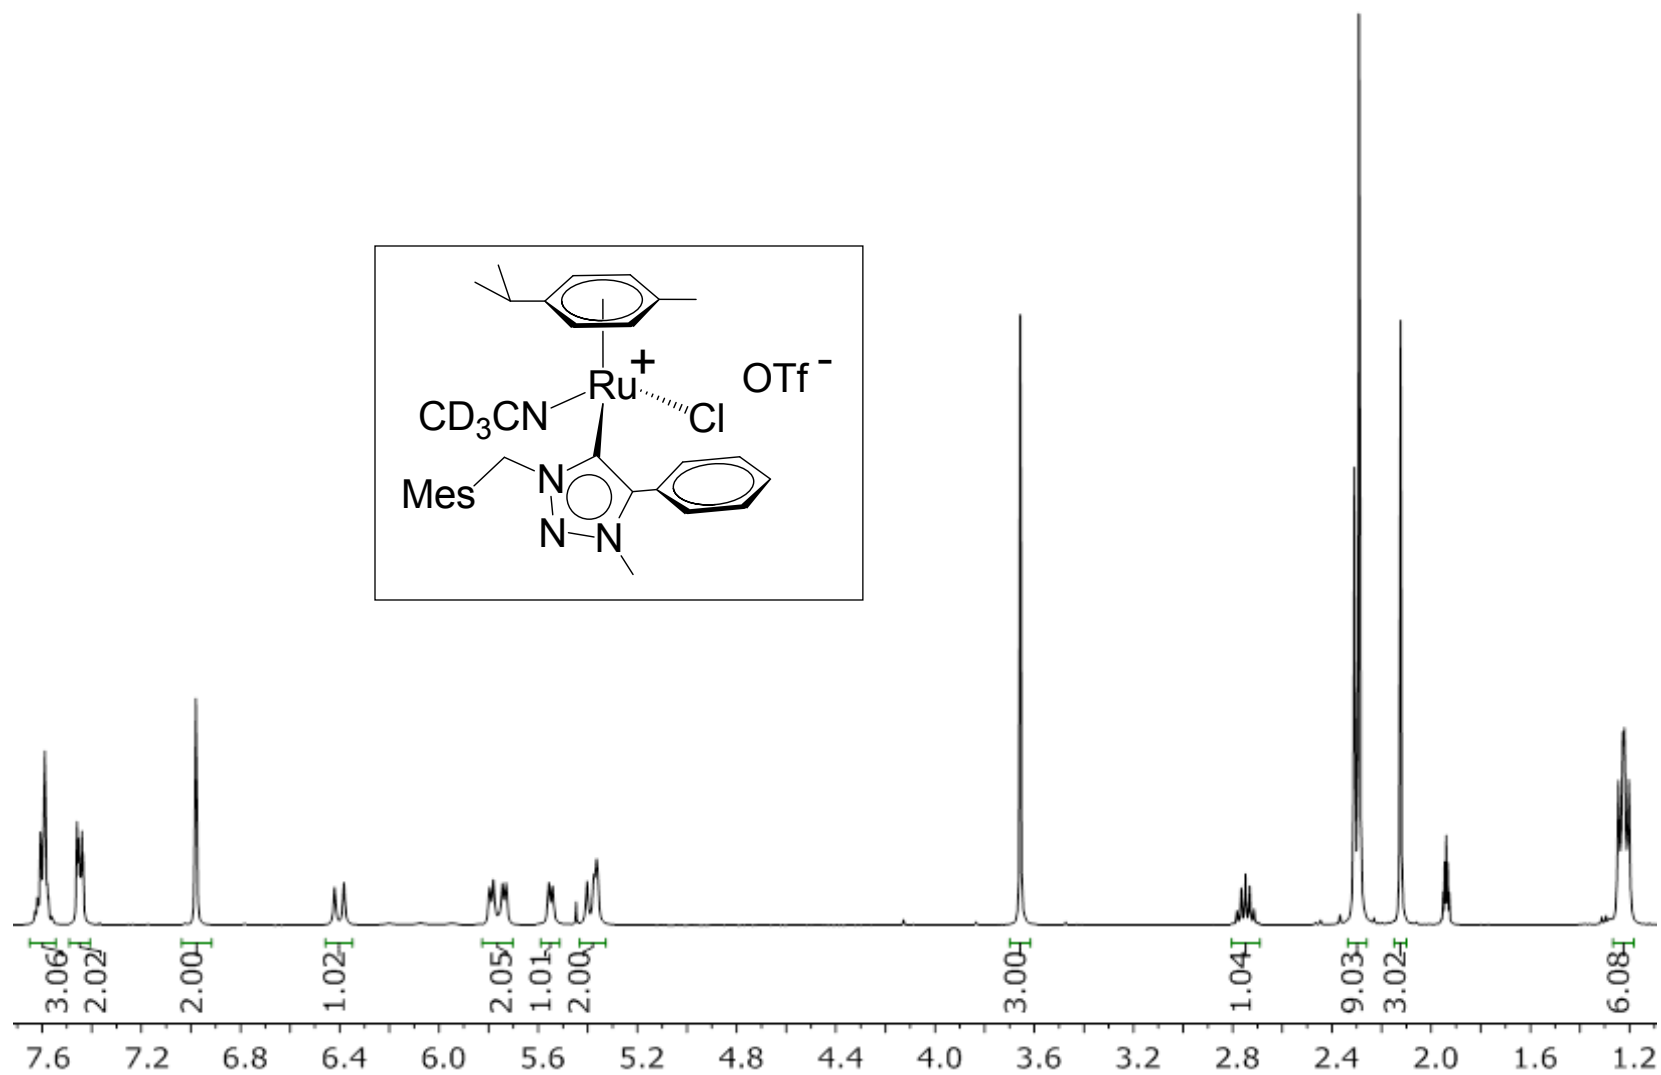

**Figure S19.**  $^1\text{H}$  NMR spectrum of **4b** in  $\text{CD}_3\text{CN}$  at r.t.

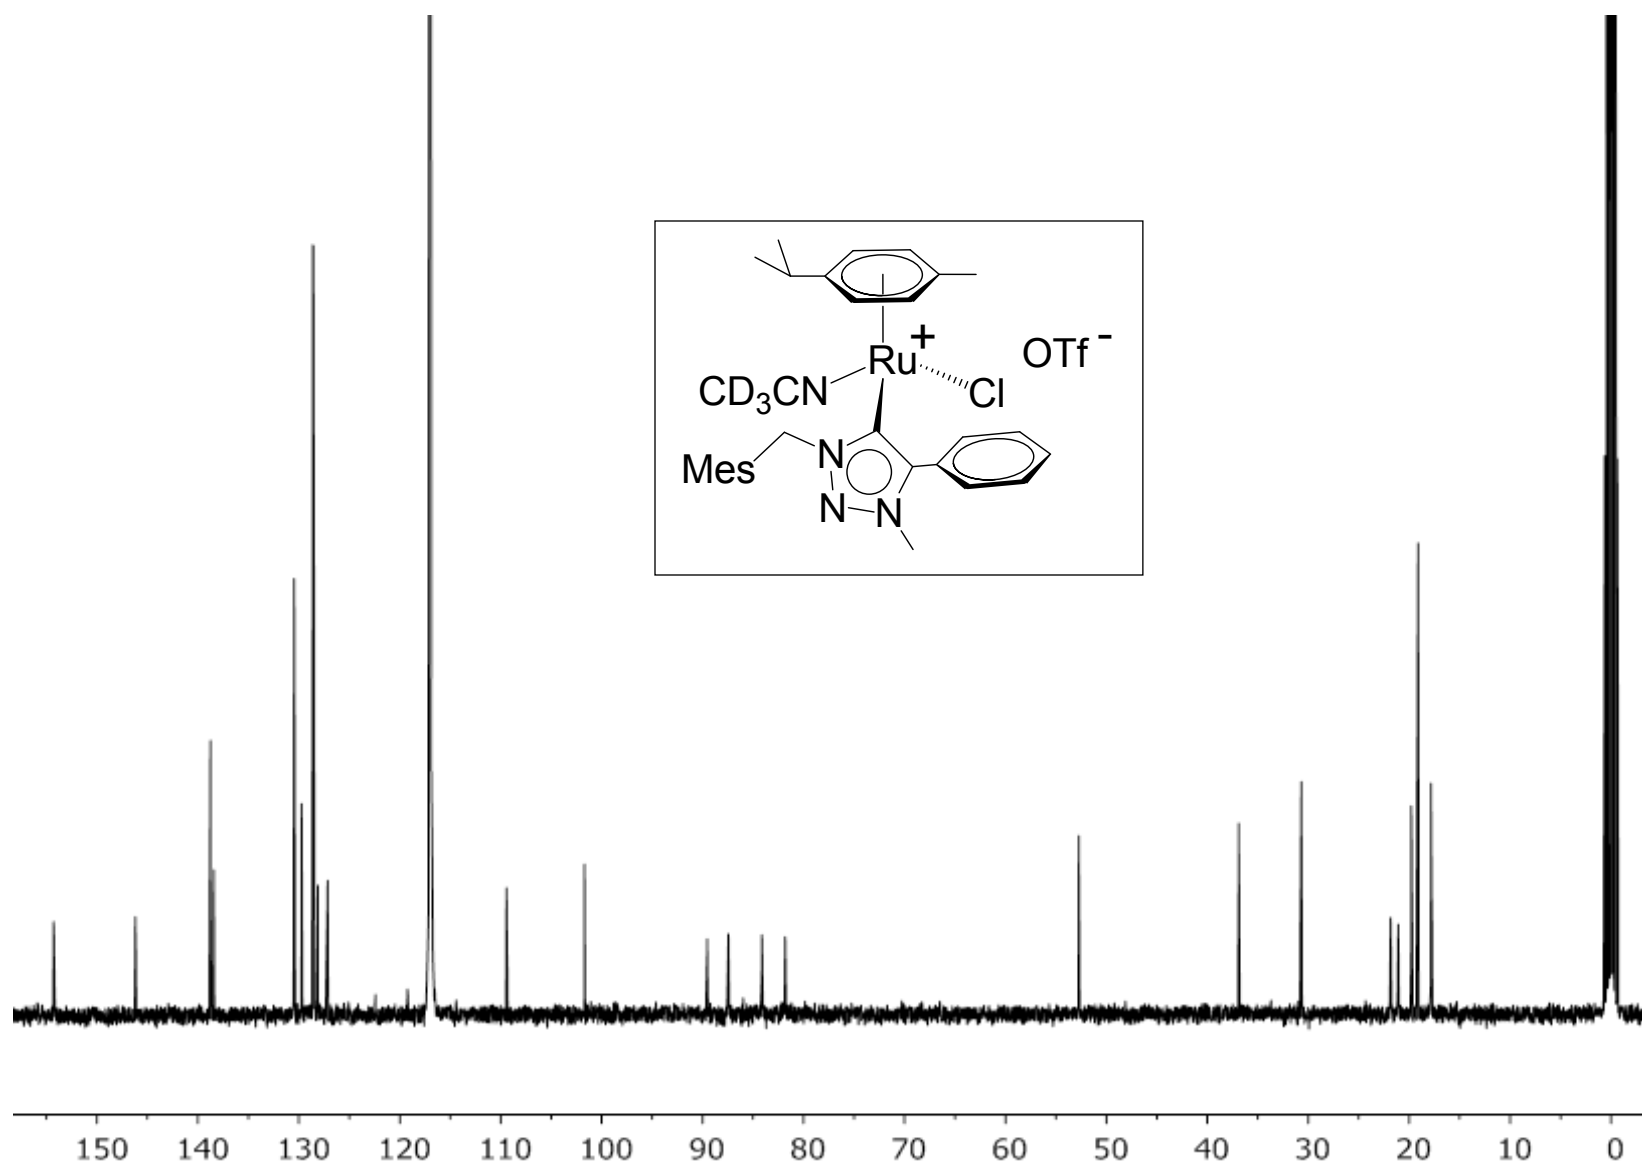

**Figure S20.**  $^{13}\text{C}$  NMR spectrum of **4b** in  $\text{CD}_3\text{CN}$  at r.t.

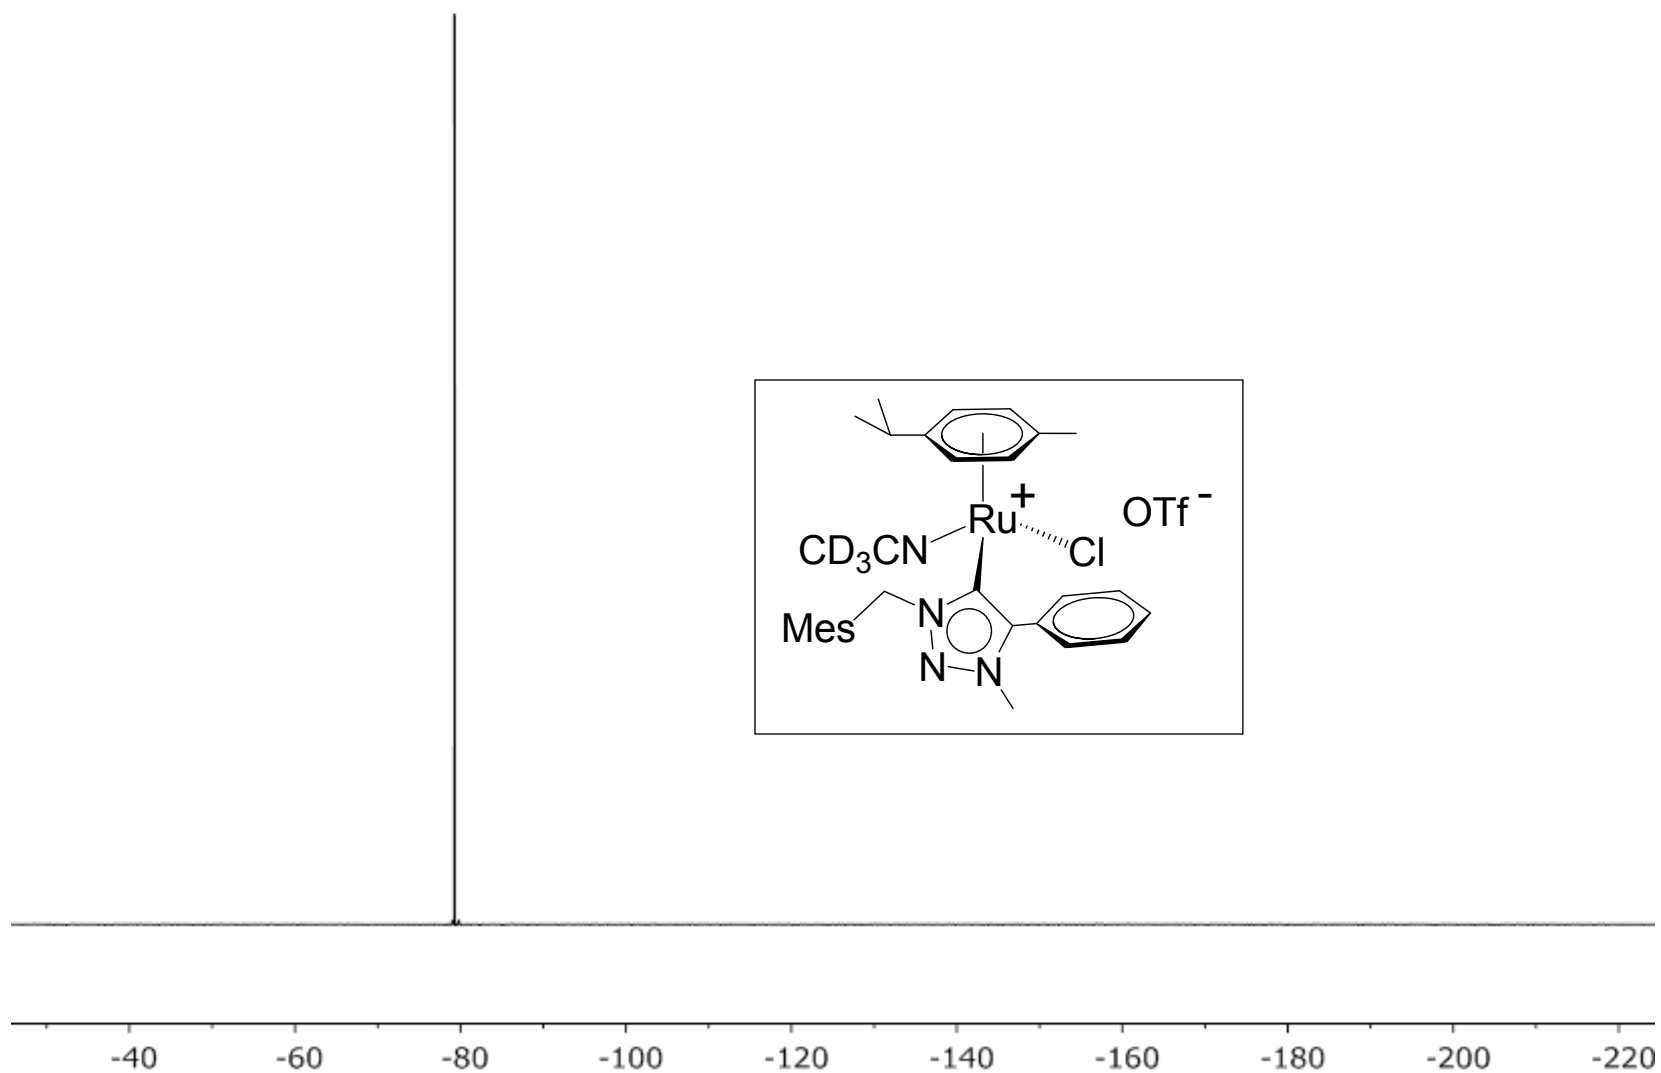

**Figure S21.**  $^{19}\text{F}$  NMR spectrum of **4b** in  $\text{CD}_3\text{CN}$  at r.t.

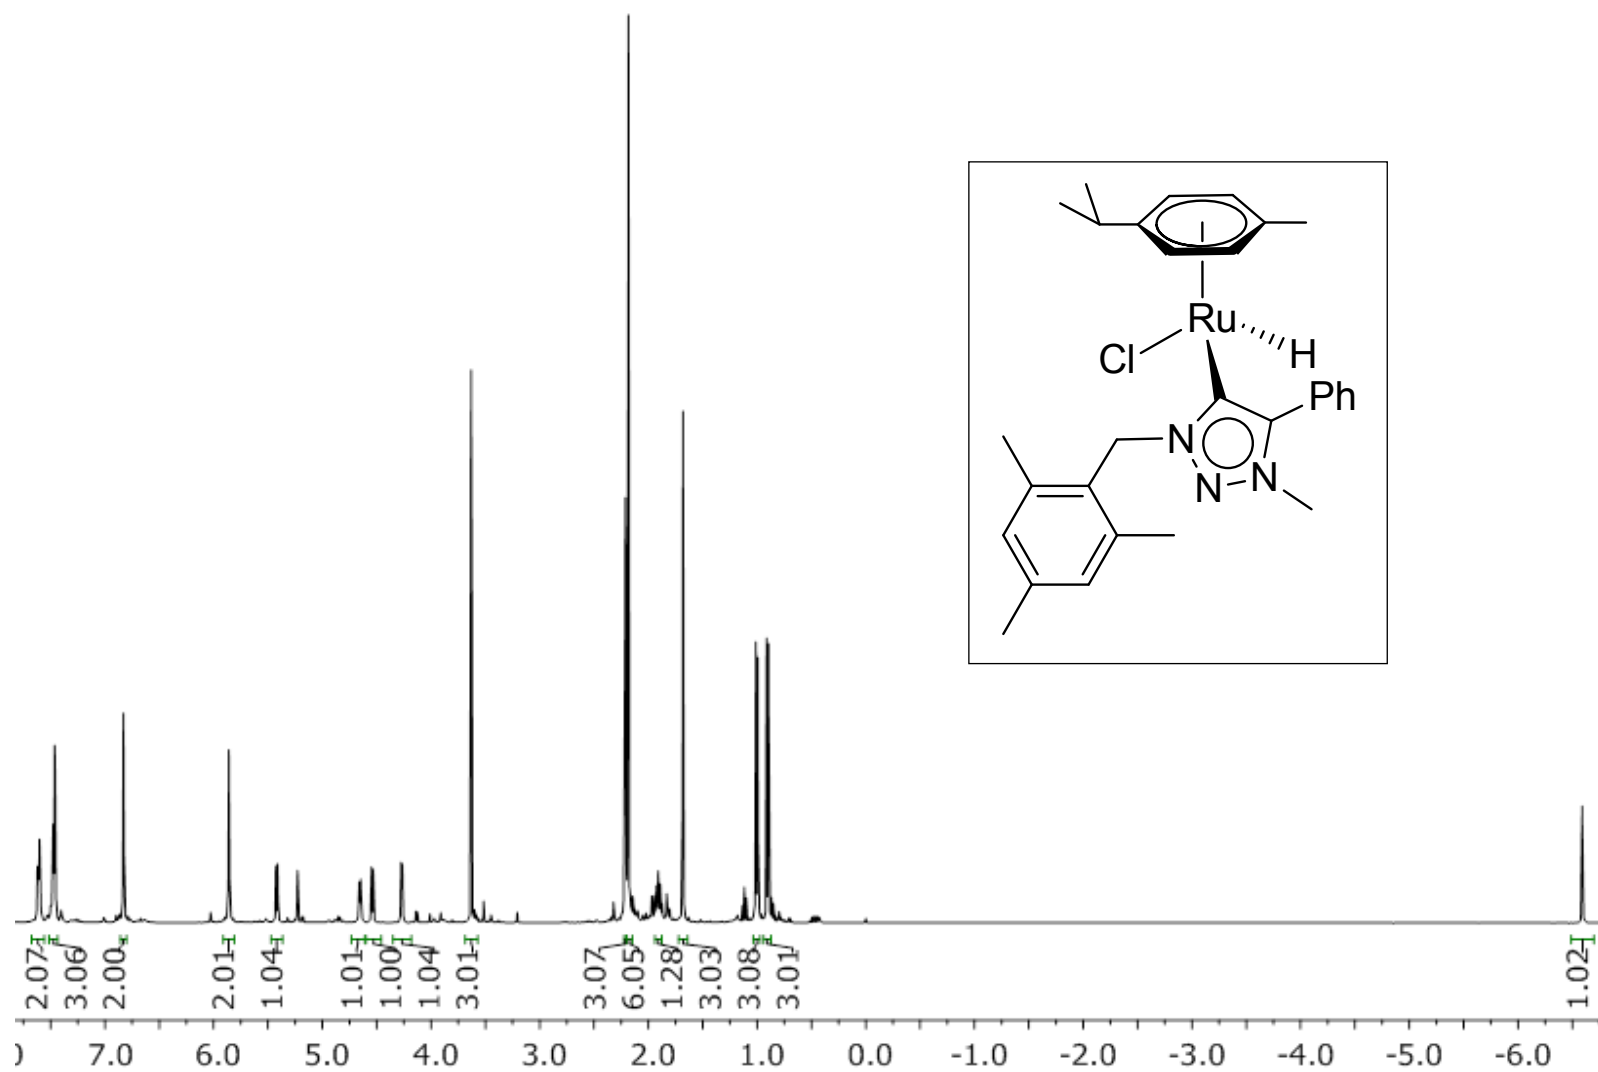

**Figure S22.**  $^1\text{H}$  NMR spectrum of **5b** in  $\text{CD}_2\text{Cl}_2$  at r.t.



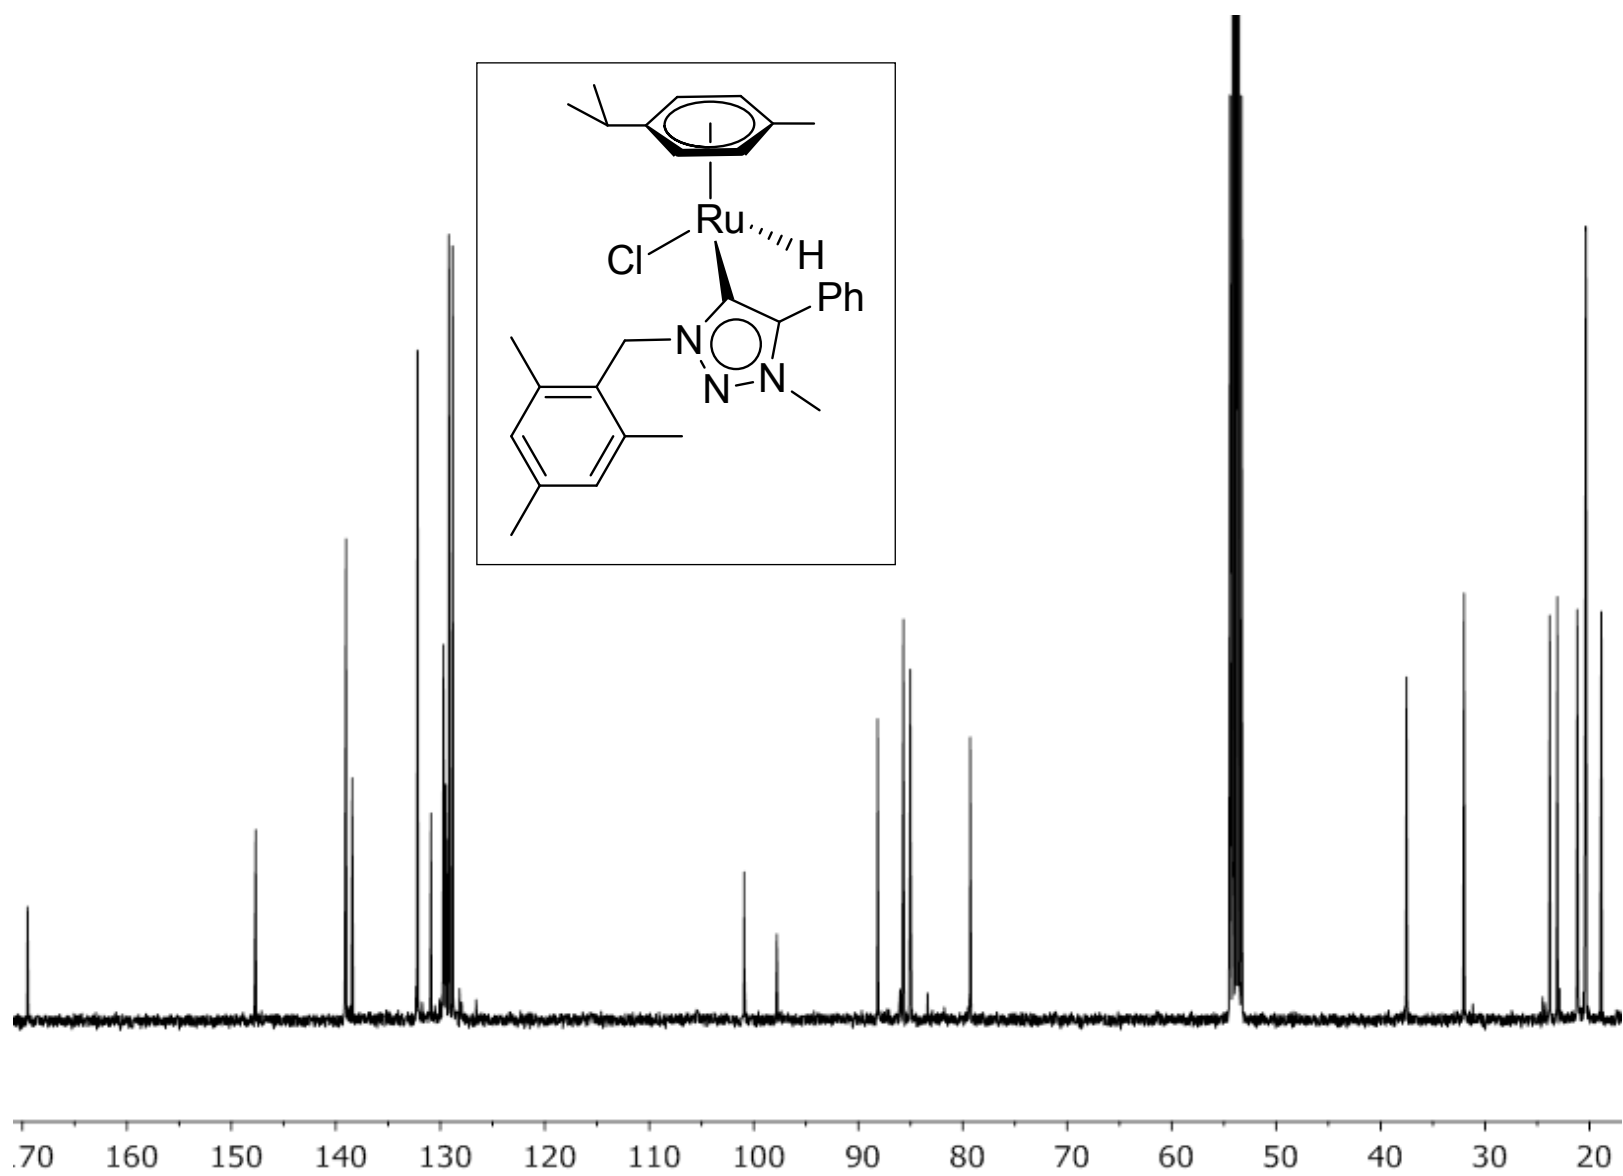

**Figure S23.**  $^{13}\text{C}$  NMR spectrum of **5b** in  $\text{CD}_2\text{Cl}_2$  at r.t.

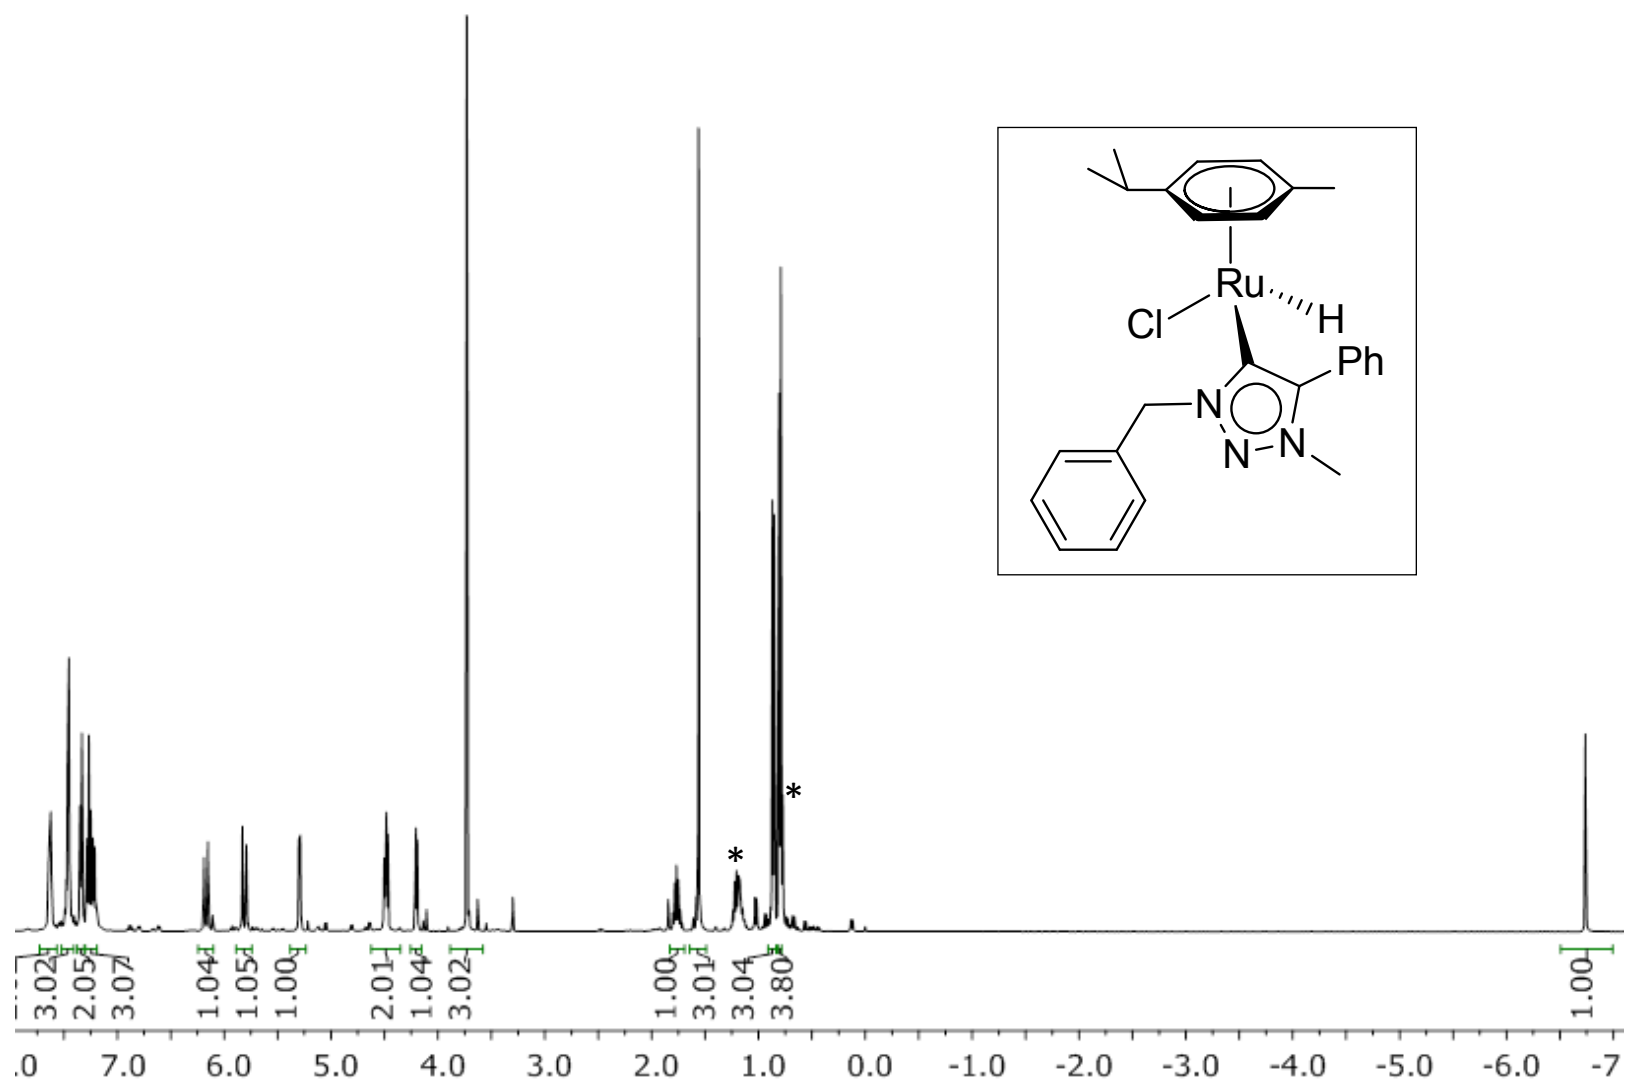

**Figure S24.**  $^1\text{H}$  NMR spectrum of **5c** in  $\text{CD}_2\text{Cl}_2$  at r.t. (\* indicated pentane).

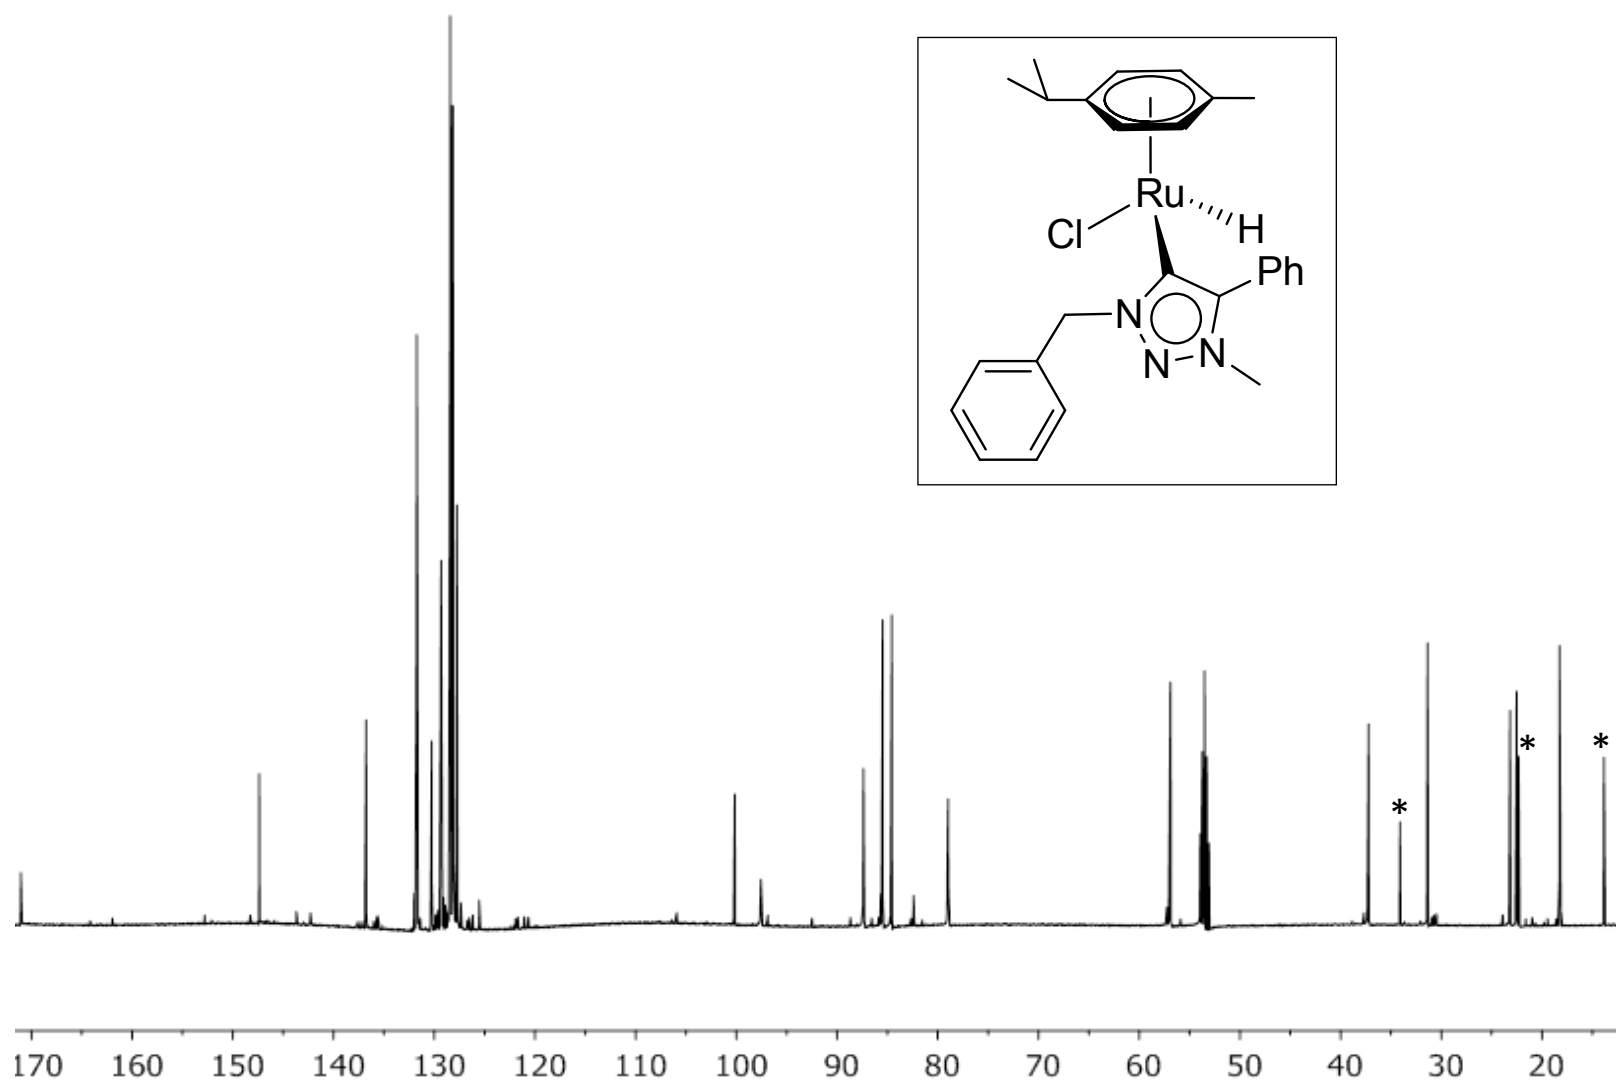

**Figure S25.**  $^{13}\text{C}$  NMR spectrum of **5c** in  $\text{CD}_2\text{Cl}_2$  at r.t. (\* indicated pentane).

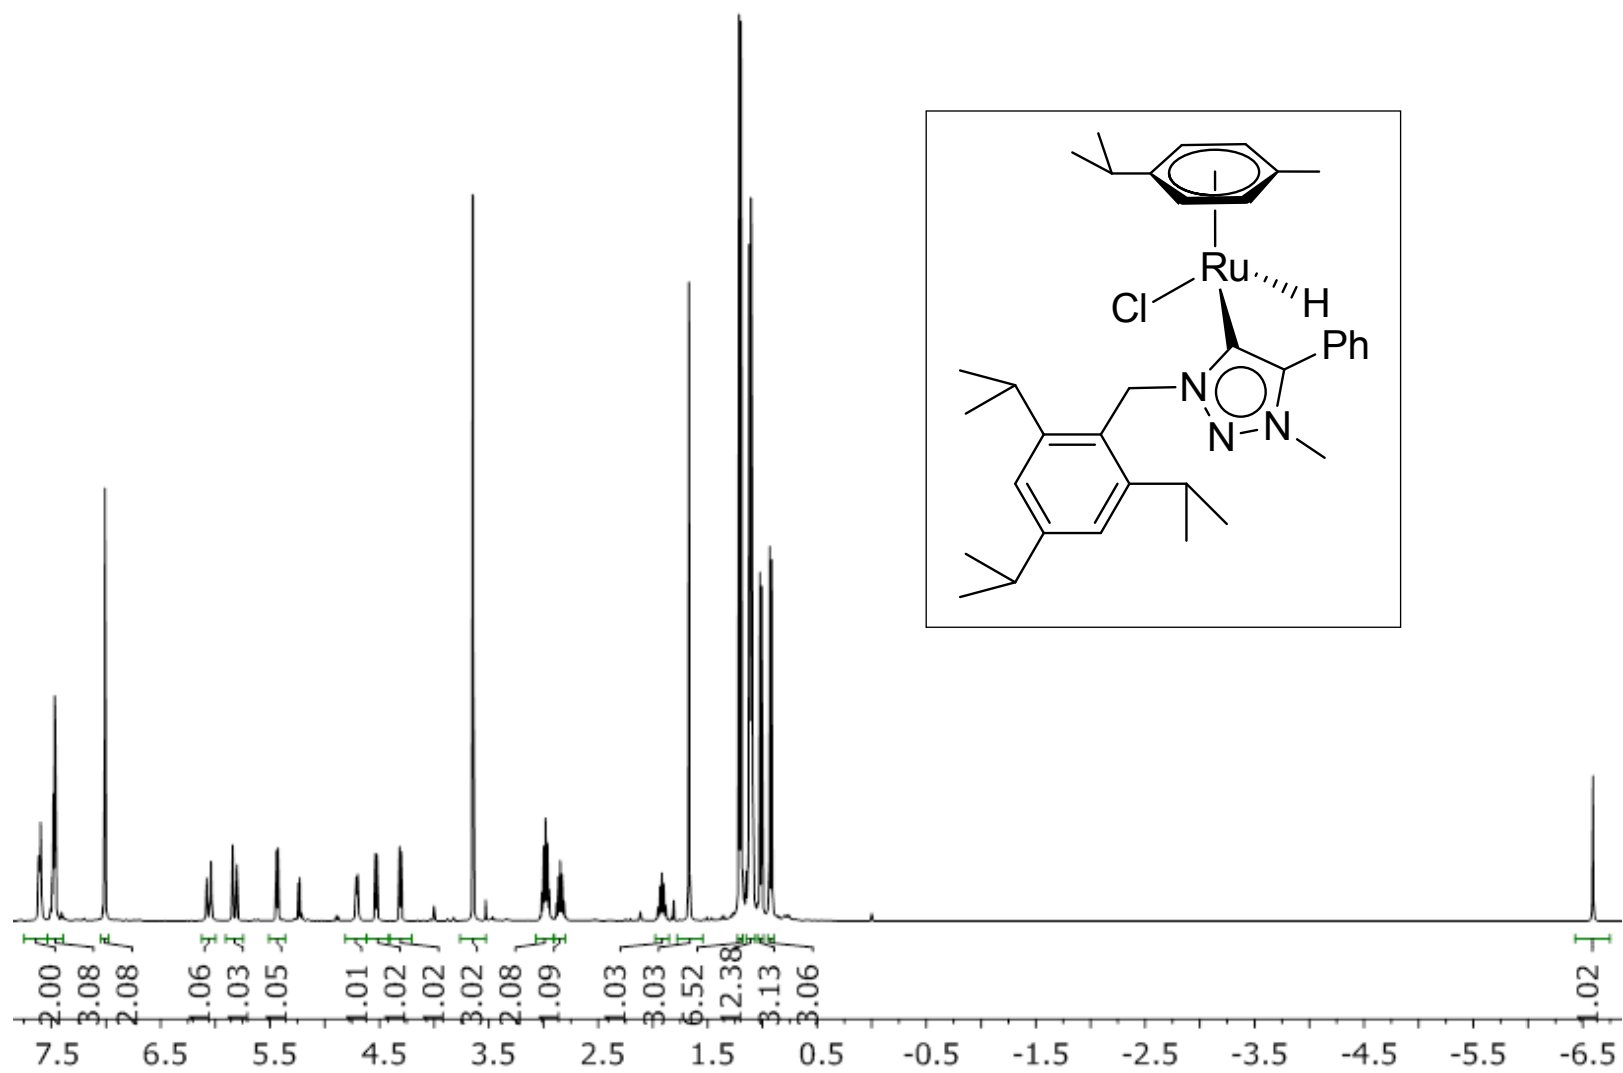

**Figure S26.**  $^1\text{H}$  NMR spectrum of **5d** in  $\text{CD}_2\text{Cl}_2$  at r.t.

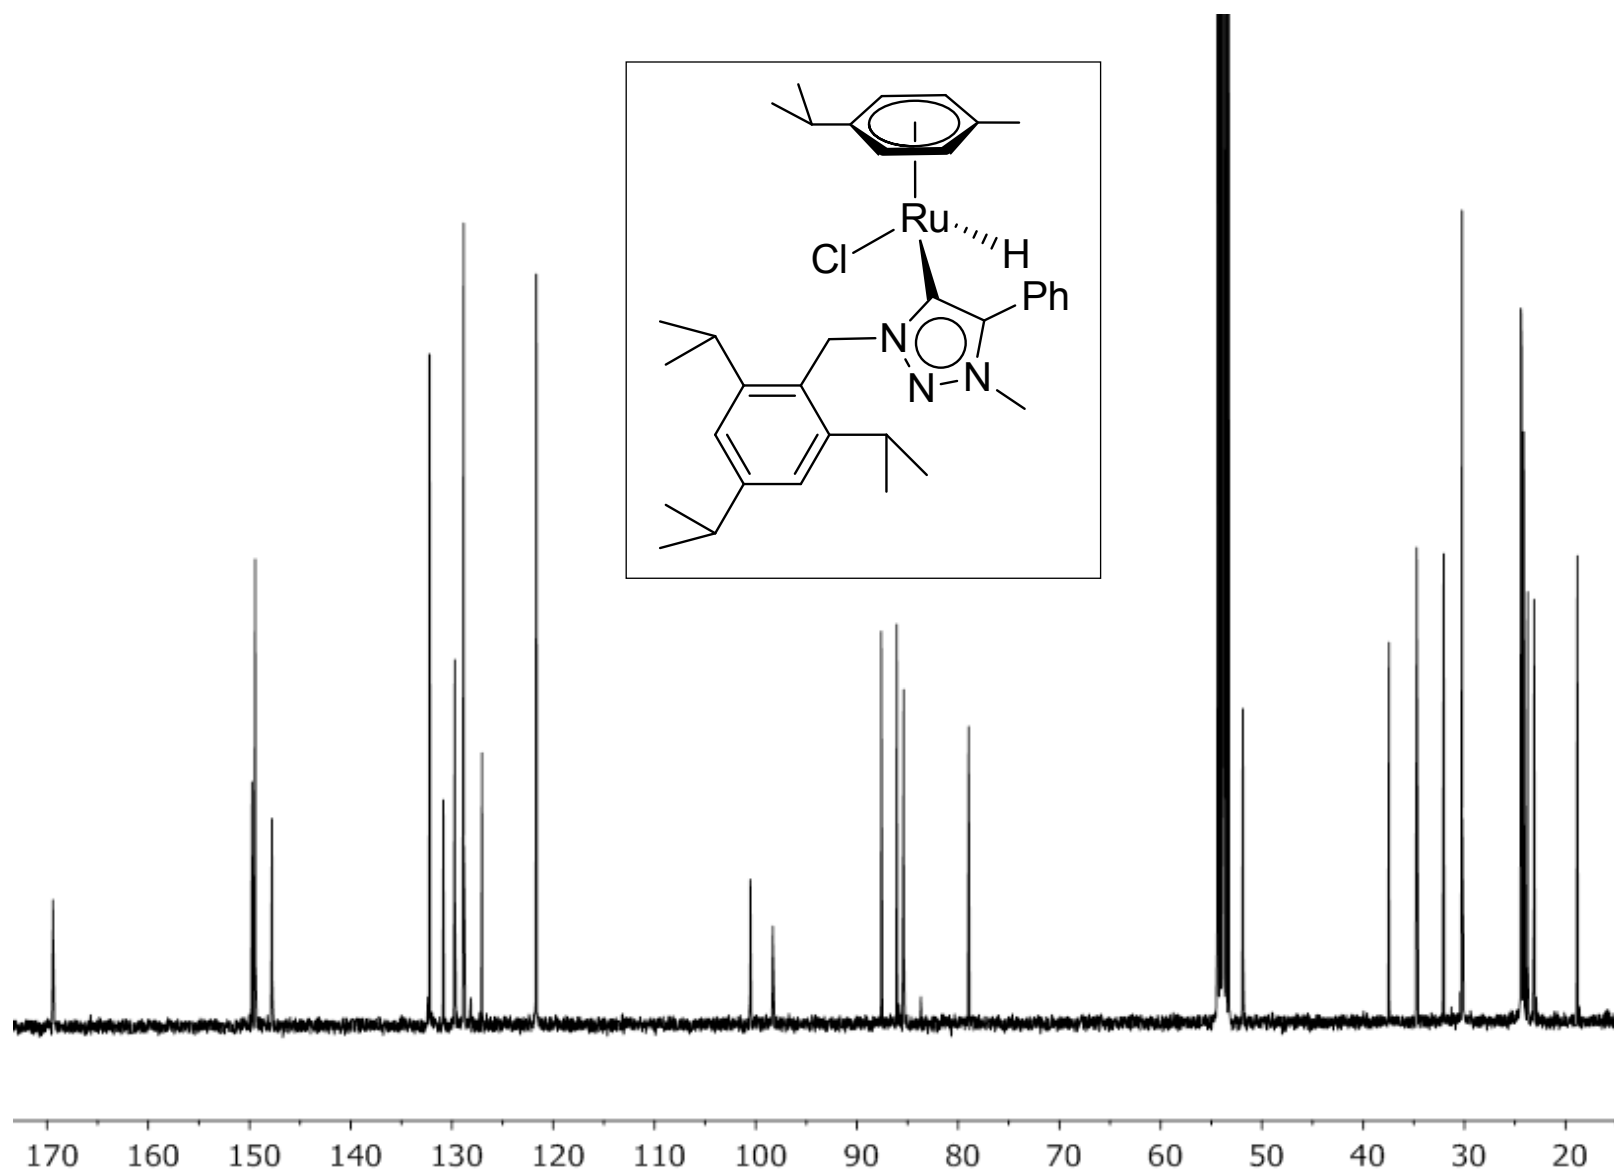

**Figure S27.**  $^{13}\text{C}$  NMR spectrum of **5d** in  $\text{CD}_2\text{Cl}_2$  at r.t.

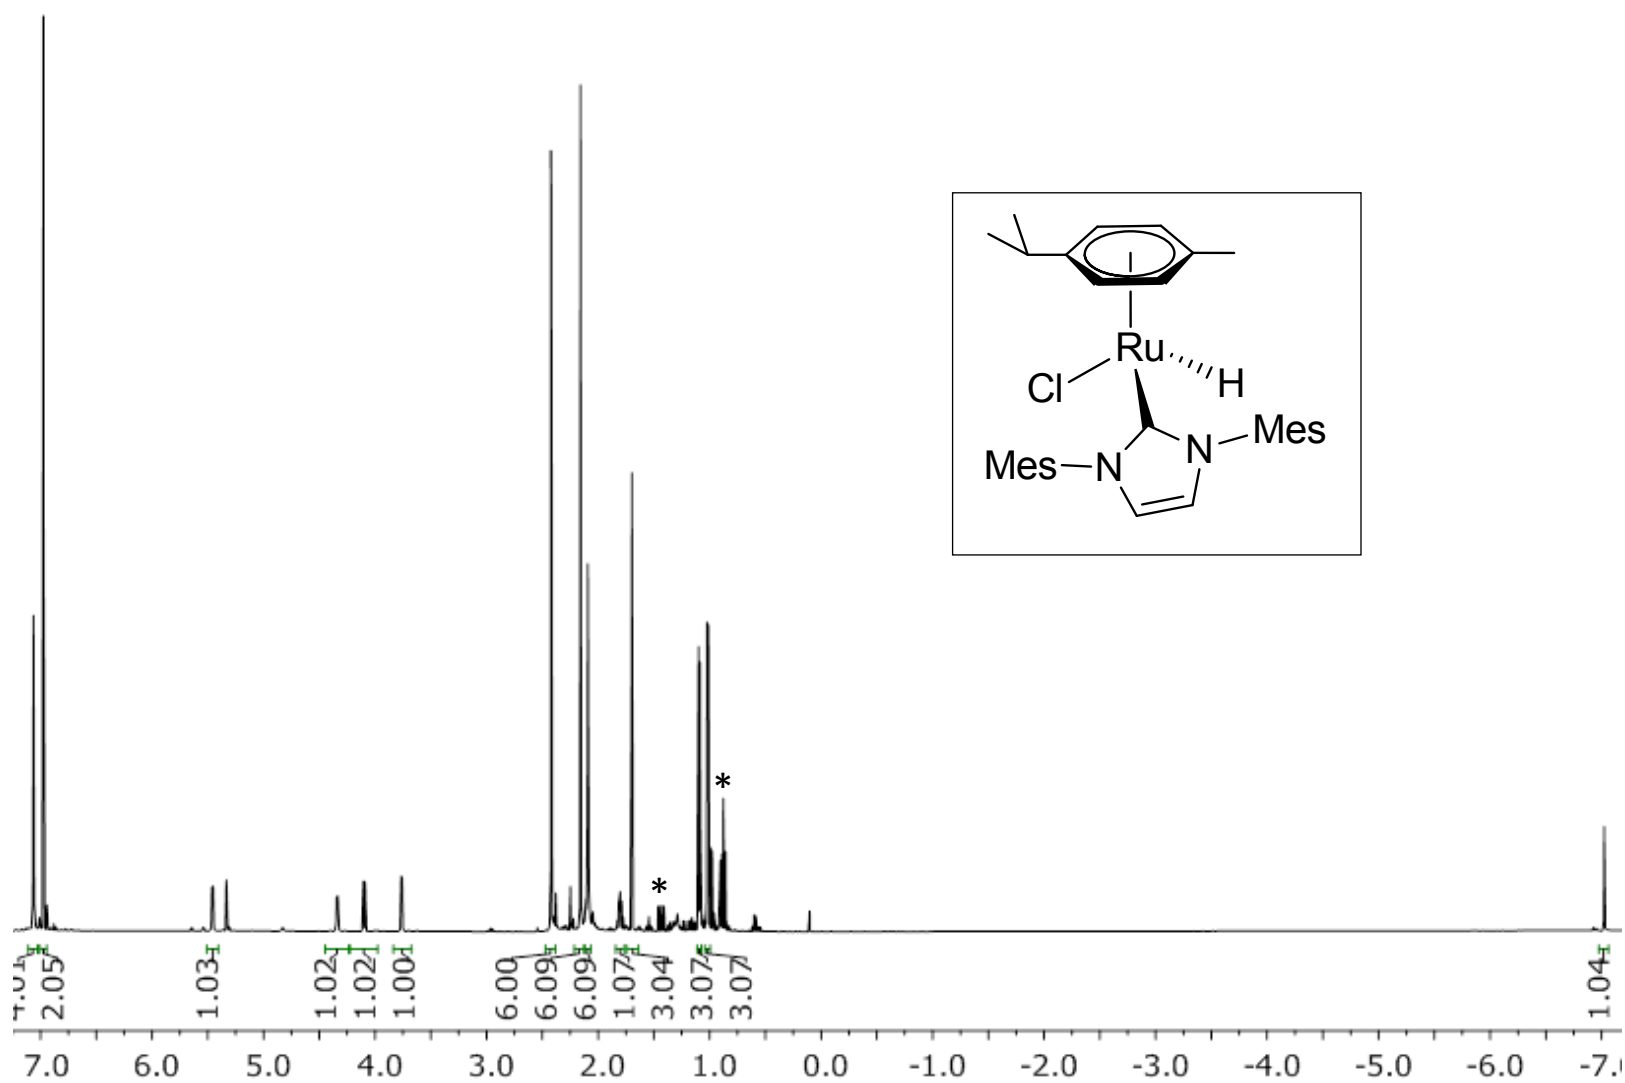

**Figure S28.**  $^1\text{H}$  NMR spectrum of **5e** in  $\text{CD}_2\text{Cl}_2$  at r.t. (\* indicates pentane).

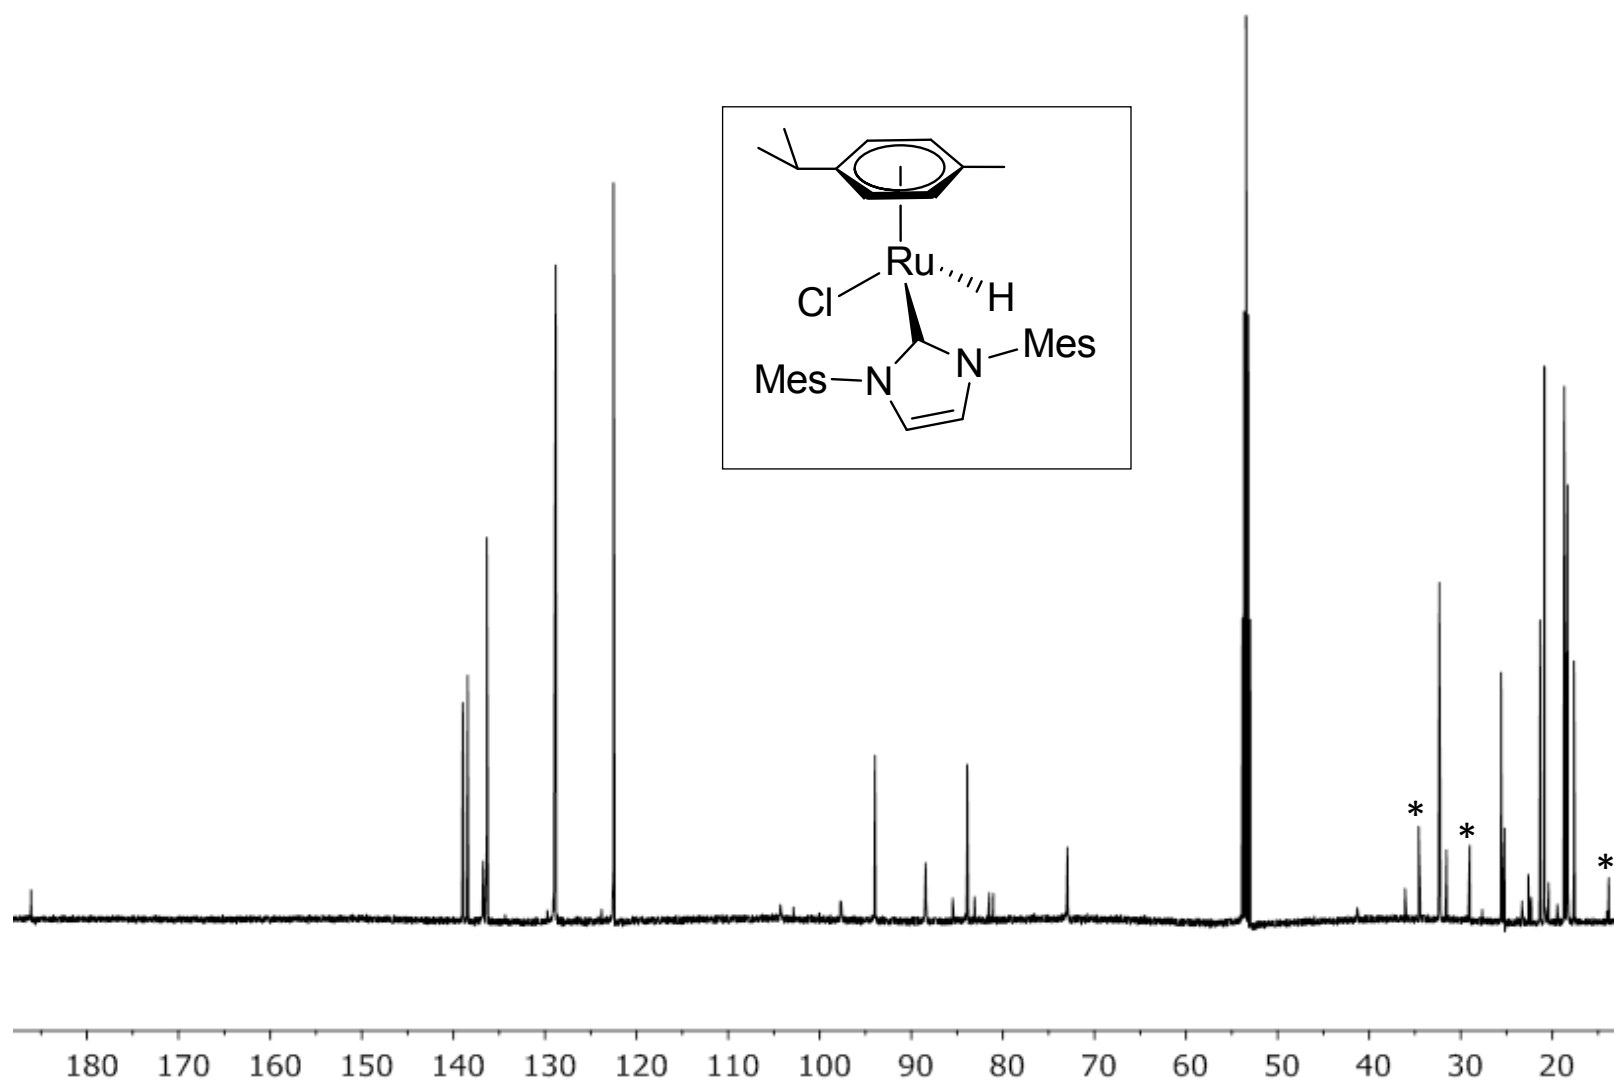

**Figure S29.**  $^{13}\text{C}$  NMR spectrum of **5e** in  $\text{CD}_2\text{Cl}_2$  at r.t. (\* indicates pentane).

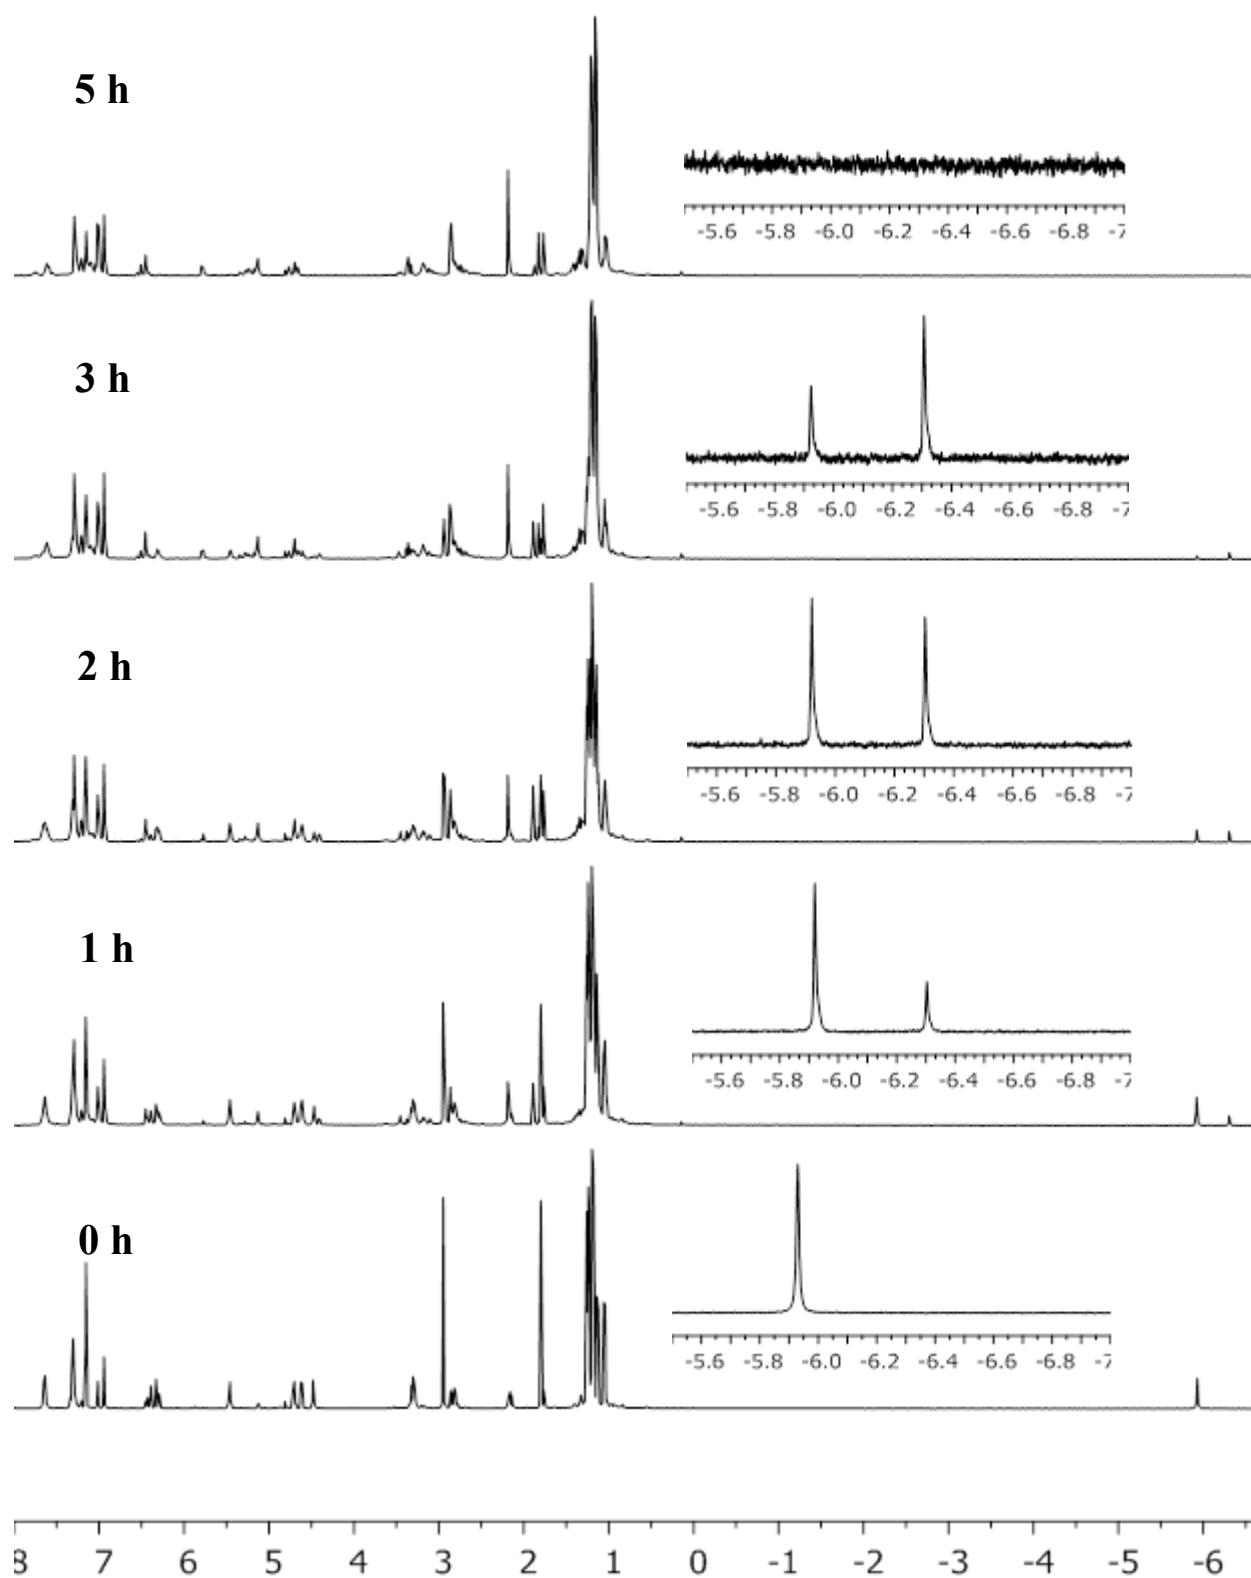

**Figure S30.** Decomposition of **5d** in  $\text{C}_6\text{D}_5\text{Br}$  at  $80^\circ\text{C}$  over time.
